# Supplementary material
Source: ML conference proceedings conference paper supplement (https://openreview.net/forum?id=bmznY5wYXH)
Supplement: supplementary_material [file supplamentary material.pdf › supplamentary material.pdf]

# Go With the Flow: Fast Diffusion for Gaussian Mixture Models

## Supplementary Material

The supplementary document is organized as follows.

- In Appendix A, we provide the technical proofs of the results in the main paper, an optimality analysis of Theorem 2, and the complexity analysis of Algorithm 1.
- In Appendix B, we discuss continuous mixtures and applications to heavy-tailed distributions.
- In Appendix C, we provide additional numerical experiments and some details for the experiments of Section 5 in the main paper.
- In Appendix D, we provide technical background for the Gaussian Schrödinger Bridges with LTV prior dynamics.

## A Proofs

All proofs are carried out for a stochastic Linear Time-Varying (LTV) system

$$dx_t = A_t x_t dt + B_t u(x_t) dt + D_t dw, \quad (\text{A.1})$$

where  $x_t \in \mathbb{R}^d$ ,  $A_t \in \mathbb{R}^{d \times d}$ ,  $u_t \in \mathbb{R}^m$ ,  $B_t \in \mathbb{R}^{d \times m}$ ,  $D_t \in \mathbb{R}^{d \times q}$  and  $dw$  is the  $q$ -dimensional Brownian increment having the properties  $\mathbb{E}[dw] = \mathbb{E}[dw dt] = 0$  and  $\mathbb{E}[dw dw^T] = I dt$ . The dynamical system (12b) is just a special case of (A.1) with  $A_t = 0$ ,  $B_t = I$ ,  $D_t = \sqrt{\epsilon} I$ , while the second order model (16b) can be captured by

$$A_t = \begin{bmatrix} 0 & I \\ 0 & 0 \end{bmatrix}, \quad B_t = \begin{bmatrix} 0 \\ I \end{bmatrix}, \quad D_t = \sqrt{\epsilon} \begin{bmatrix} 0 \\ I \end{bmatrix}. \quad (\text{A.2})$$

### A.1 The Fokker-Planck-Kolmogorov Equation

The equation describing the propagation of the distribution of the state of the dynamical system (A.1), known as the Fokker-Planck-Kolmogorov (FPK) equation (Särkkä & Solin, 2019) is:

$$\frac{\partial \rho_t}{\partial t} + \sum_i \frac{\partial}{\partial x_i} \left( \rho_t (A_t x + B_t u_t(x)) \right) - \frac{1}{2} \sum_{i,j} \frac{\partial^2}{\partial x_i \partial x_j} ([D_t D_t^T]_{ij} \rho_t) = 0, \quad (\text{A.3})$$

where, for simplicity, we write  $\rho_t = \rho(t, x)$ . This equation can be written more compactly using standard vector notation as follows

$$\frac{\partial \rho_t}{\partial t} + \nabla \cdot \left( \rho_t (A_t x + B_t u_t(x)) \right) - \frac{1}{2} \text{tr} (D_t D_t^T \nabla^2 \rho_t) = 0, \quad (\text{A.4})$$

where  $\nabla^2 \rho_t$  denotes the Hessian of the density with respect to the state  $x$  at time  $t$ . In the specific case where  $D_t = \sqrt{\epsilon} I$ , equation (A.4) reduces to the well-known equation

$$\frac{\partial \rho_t}{\partial t} + \nabla \cdot \left( \rho_t (A_t x + B_t u_t(x)) \right) - \frac{\epsilon}{2} \Delta \rho_t = 0, \quad (\text{A.5})$$

where  $\Delta$  denotes the Laplacian operator.

### A.2 Proof of Proposition 2

Let  $\rho_0 \sim \mathcal{N}(\mu_0, \Sigma_0)$ ,  $\rho_1 \sim \mathcal{N}(\mu_1, \Sigma_1)$  be two multivariate Gaussian measures in  $\mathbb{R}^d$ , and consider the entropy regularized 2-Wasserstein distance problem between  $\rho_0$  and  $\rho_1$ , defined by

$$\mathbb{W}_2^\epsilon(\rho_0 \| \rho_1) \triangleq \min_{\pi \in \Pi(\rho_0, \rho_1)} \int \|x - y\|^2 d\pi(x, y) + \epsilon D_{\text{KL}}(\pi \| \rho_0 \otimes \rho_1), \quad (\text{A.6})$$

where  $D_{\text{KL}}$  denotes the KL-divergence operator.

In (Mallasto et al., 2022, Theorem 2), it is shown that (A.6) admits the following closed-form solution

$$\mathbb{W}_2^\epsilon(\rho_0 \| \rho_1) = \|\mu_1 - \mu_0\|^2 + \text{tr}(\Sigma_0) + \text{tr}(\Sigma_1) - \frac{\epsilon}{2} (\text{tr} M_\epsilon - \log \det M_\epsilon + d \log 2 - 2d), \quad (\text{A.7})$$

where  $M_\epsilon = I + (I + (4/\epsilon)^2 \Sigma_0 \Sigma_1)^{\frac{1}{2}}$ .

Returning to Problem (6), let  $\mathcal{P}, \mathcal{W}^\epsilon$  be the path measures corresponding to the controlled SDE of (6) (expressed as the first constraint) and the Brownian motion with covariance  $\epsilon I$  respectively, with initial conditions sampled from  $\rho_0$ . Let  $\mathcal{D}(\rho_0, \rho_1)$  denote the set of all path measures with marginals  $\rho_0, \rho_1$  at times  $t = 0$  and  $t = 1$ . Then, the SB problem (6) admits the following equivalent representations:

$$\inf_{\mathcal{P} \in \mathcal{D}(\rho_0, \rho_1)} D_{\text{KL}}(\mathcal{P} \| \mathcal{W}^\epsilon) = \inf_{\pi \in \Pi(\rho_0, \rho_1)} \left\{ \int \frac{\|x - y\|^2}{2\epsilon} d\pi(x, y) - H(\pi) + H(\rho_0) + \frac{d}{2} \log(2\pi e) \right\} \quad (\text{A.8a})$$

$$= \inf_{\mathcal{P} \in \mathcal{D}(\rho_0, \rho_1)} \mathbb{E} \left[ \int_0^1 \frac{1}{2\epsilon} \|u_t(x_t)\|^2 dt \right] = \frac{1}{2\epsilon} J_{\text{GSB}}, \quad (\text{A.8b})$$

where (A.8a) is due to the disintegration of the path measures, and (A.8b) is due to Girsanov's Theorem. We refer the reader to Chen et al. (2021) for a detailed derivation. Solving (A.8b) for  $J_{\text{GSB}}$ , we obtain

$$J_{\text{GSB}} = \inf_{\pi} \left\{ \int \|x - y\|^2 d\pi(x, y) - 2\epsilon H(\pi) - 2\epsilon H(\rho_1) \right\}, \quad (\text{A.9})$$

up to a constant independent of the parameters of  $\rho_0, \rho_1$ . Using the closed form solution for (A.7), and noting that

$$D_{\text{KL}}(\pi \| \rho_0 \otimes \rho_1) = -H(\pi) + H(\rho_0) + H(\rho_1), \quad (\text{A.10})$$

and that the differential entropy of the multivariate Gaussian distribution is

$$H(\rho_1) = \frac{1}{2} \log \det \Sigma_1 + \frac{d}{2} \log 2\pi e, \quad (\text{A.11})$$

we conclude that the optimal cost of Problem (6) is equal to

$$\begin{aligned} J_{\text{GSB}} &= \mathbb{W}_2^{2\epsilon}(\rho_0 \| \rho_1) - 2\epsilon H(\rho_1) \\ &= \|\mu_1 - \mu_0\|^2 + \text{tr}(\Sigma_0) + \text{tr}(\Sigma_1) - \epsilon (\text{tr} M_{2\epsilon} - \log \det M_{2\epsilon} + \log \det \Sigma_1), \end{aligned} \quad (\text{A.12a})$$

up to a numerical constant independent of  $\rho_0, \rho_1$ , which concludes the proof.

### A.3 Proof of Theorem 1

First, notice that the probability flow (14) satisfies the constraints (12c) for all feasible values of  $\lambda_{ij}$ , since

$$\rho_0 = \sum_{i,j} \rho_{0|ij} \lambda_{ij} = \sum_{i,j} \mathcal{N}(\mu_0^i, \Sigma_0^i) \lambda_{ij} = \sum_i \mathcal{N}(\mu_0^i, \Sigma_0^i) \alpha_0^i, \quad (\text{A.13a})$$

$$\rho_1 = \sum_{i,j} \rho_{1|ij} \lambda_{ij} = \sum_{i,j} \mathcal{N}(\mu_1^j, \Sigma_1^i) \lambda_{ij} = \sum_j \mathcal{N}(\mu_1^j, \Sigma_1^i) \alpha_1^j. \quad (\text{A.13b})$$

Therefore, it suffices to show that the policy (13) produces the probability flow (14). Following the approach of Lipman et al. (2023) and Liu et al. (2024), we show that the pair (13), (14) satisfies the FPK equation. We start from the FPK equation describing a conditional flow and sum over all conditional variables to retrieve the unconditional flow. Specifically, given that the individual policies  $u_{t|ij}$  solve the Gaussian Bridge subproblems (6), the pair  $(\rho_{t|ij}, u_{t|ij})$  satisfies the FPK equation for the dynamical system (A.1), that is,

$$\frac{\partial \rho_{t|ij}}{\partial t} + \nabla \cdot (\rho_{t|ij} (A_t x + B_t u_{t|ij})) - \frac{1}{2} \text{tr} (D_t D_t^\top \nabla^2 (\rho_{t|ij})) = 0. \quad (\text{A.14})$$

Multiplying equation (A.14) by  $\lambda_{ij}$  and summing over  $i, j$ , we obtain

$$\sum_{i,j} \lambda_{ij} \left[ \frac{\partial \rho_{t|ij}}{\partial t} + \nabla \cdot (\rho_{t|ij} (A_t x + B_t u_{t|ij})) - \frac{1}{2} \text{tr} (D_t D_t^\top \nabla^2 (\rho_{t|ij})) \right] = 0, \quad (\text{A.15})$$

which implies that

$$\begin{aligned} \frac{\partial}{\partial t} \left( \sum_{i,j} \rho_{t|ij} \lambda_{ij} \right) + \nabla \cdot \left( A_t x \sum_{i,j} \rho_{t|ij} \lambda_{ij} + B_t \sum_{i,j} u_{t|ij} \rho_{t|ij} \lambda_{ij} \right) \\ - \frac{1}{2} \text{tr} \left( D_t D_t^\top \nabla^2 \left( \sum_{i,j} \rho_{t|ij} \lambda_{ij} \right) \right) = 0. \end{aligned} \quad (\text{A.16})$$

This can be further simplified as

$$\frac{\partial \rho_t}{\partial t} + \nabla \cdot \left( \rho_t \left( A_t x + B_t \sum_{i,j} u_{t|ij} \frac{\rho_{t|ij} \lambda_{ij}}{\sum_{i,j} \rho_{t|ij} \lambda_{ij}} \right) \right) - \frac{1}{2} \text{tr} (D_t D_t^\top \nabla^2 (\rho_t)) = 0, \quad (\text{A.17})$$

which yields that

$$\frac{\partial \rho_t}{\partial t} + \nabla \cdot (\rho_t (A_t x + B_t u_t)) - \frac{1}{2} \text{tr} (D_t D_t^\top \nabla^2 (\rho_t)) = 0. \quad (\text{A.18})$$

This completes the proof.

#### A.4 Proof of Theorem 2

It suffices to show that the cost (12a) is upper bounded by the cost of (15a). Substituting policy (13) to the cost (12a) we obtain

$$J_{\text{GMM}} = \mathbb{E}_{x_t \sim \rho_t} \left[ \int_0^1 \left\| \sum_{i,j} u_{t|ij}(x_t) \frac{\rho_{t|ij}(x_t) \lambda_{ij}}{\sum_{i,j} \rho_{t|ij}(x_t) \lambda_{ij}} \right\|^2 dt \right] \quad (\text{A.19a})$$

$$= \int_0^1 \int \rho_t(x) \left\| \sum_{i,j} u_{t|ij}(x) \frac{\rho_{t|ij}(x) \lambda_{ij}}{\sum_{i,j} \rho_{t|ij}(x) \lambda_{ij}} \right\|^2 dx dt \quad (\text{A.19b})$$

$$\leq \int_0^1 \int \rho_t(x) \frac{\sum_{i,j} \|u_{t|ij}(x)\|^2 \rho_{t|ij}(x) \lambda_{ij}}{\sum_{i,j} \rho_{t|ij}(x) \lambda_{ij}} dx dt \quad (\text{A.19c})$$

$$= \int_0^1 \int \sum_{i,j} \|u_{t|ij}(x)\|^2 \rho_{t|ij}(x) \lambda_{ij} dx dt \quad (\text{A.19d})$$

$$= \sum_{i,j} \lambda_{ij} \mathbb{E}_{x_t \sim \rho_{t|ij}} \left[ \int_0^1 \|u_{t|ij}(x_t)\|^2 dt \right] \quad (\text{A.19e})$$

$$= \sum_{i,j} \lambda_{ij} J_{ij} = J_{\text{OT}}, \quad (\text{A.19f})$$

where (A.19b) is due to Fubini's theorem (Wheeden & Zygmund, 1977, Theorem 6.1) and (A.19c) makes use of the discrete version of Jensen's inequality (Wheeden & Zygmund, 1977, Theorem 7.35).

#### A.5 Optimality of the Upper Bound of Theorem 2.

To assess the optimality of the upper bound introduced in Theorem 2, we study the gap between  $J_{\text{OT}}$  and  $J_{\text{GMM}}$  in the following theorem.

**Theorem 7.** *In the setting of Theorem 2, let  $\rho_{t|ij}(x)$ ,  $u_{t|ij}(x)$  be the solution of the  $(i, j)$ -GSB and  $u_t(x)$ ,  $\rho_t(x)$  as defined in (13), (14). Then, the following bound holds for  $J_{\text{OT}}$ ,  $J_{\text{GMM}}$ .*

$$0 \leq J_{\text{OT}} - J_{\text{GMM}} \leq \int_0^1 \int_{\mathbb{R}^n} \sum_{i,j} \sum_{\substack{i' \neq i \\ j' \neq j}} \|u_{t|ij} - u_{t|i'j'}\|^2 \min\{\lambda_{ij} \rho_{t|ij}, \lambda_{i'j'} \rho_{t|i'j'}\} dx dt, \quad (\text{A.20})$$

where the dependence on  $x$  is omitted for notational convenience.

*Proof.* We first express  $u_t(x)$  as an expectation, i.e.,

$$u_t(x) = \sum_{i,j} u_{t|i,j}(x) \frac{\rho_{t|i,j}(x) \lambda_{ij}}{\rho_t(x)} = \mathbb{E}[\omega_t(x)],$$

where  $\omega_t(x)$  follows a discrete distribution defined by  $\{\omega_t(x) = u_{t|i,j}(x) \text{ w.p. } \rho_{t|i,j}(x) \lambda_{ij} / \rho_t(x)\}$ . Note that for a random variable  $x \in \mathbb{R}^d$ , the variance decomposition yields

$$\|\mathbb{E}[x]\|^2 = \mathbb{E}[\|x\|^2] - \mathbb{E}[\|x - \mathbb{E}[x]\|^2].$$

Using the last equation and the expression  $u_t(x)$  above, written as an expectation, we obtain

$$\begin{aligned} J_{\text{GMM}} &\triangleq \int_0^1 \int_{\mathbb{R}^d} \rho_t(x) \|u_t(x)\|^2 dx dt \\ &= \int_0^1 \int_{\mathbb{R}^d} \sum_{i,j} \lambda_{ij} \rho_{t|i,j} \|u_{t|i,j}(x)\|^2 dx dt - \int_0^1 \int_{\mathbb{R}^d} \sum_{i,j} \lambda_{ij} \rho_{t|i,j} \|u_{t|i,j}(x) - u_t(x)\|^2 dx dt \\ &= J_{\text{OT}} - \int_0^1 \int_{\mathbb{R}^d} \sum_{i,j} \lambda_{ij} \rho_{t|i,j} \|u_{t|i,j} - u_t\|^2 dx dt. \end{aligned}$$

The fact that the second term in the last equation is non-negative justifies the upper bound in Theorem 2. Next, we show that when the conditional densities are well separated, the second term in the last equation becomes arbitrarily small, and the bound becomes tight. Expanding the term inside the norm in the integral of the last equation, and dropping the dependence on  $x$  for notational convenience, we obtain

$$\begin{aligned} \|u_{t|i,j} - u_t\|^2 &= \left\| u_{t|i,j} - \sum_{i',j'} u_{t|i',j'} \frac{\lambda_{i',j'} \rho_{t|i',j'}}{\rho_t} \right\|^2 \\ &= \left\| \frac{u_{t|i,j} \rho_t - \sum_{i',j'} u_{t|i',j'} \lambda_{i',j'} \rho_{t|i',j'}}{\rho_t} \right\|^2 \\ &\leq \left( \sum_{i',j'} \|u_{t|i,j} - u_{t|i',j'}\| \frac{\lambda_{i',j'} \rho_{t|i',j'}}{\rho_t} \right)^2 \quad (\text{due to Jensen's inequality}) \\ &\leq \sum_{i',j'} \|u_{t|i,j} - u_{t|i',j'}\|^2 \frac{\lambda_{i',j'} \rho_{t|i',j'}}{\rho_t} \\ &= \sum_{\substack{i' \neq i \\ j' \neq j}} \|u_{t|i,j} - u_{t|i',j'}\|^2 \frac{\lambda_{i',j'} \rho_{t|i',j'}}{\rho_t}. \end{aligned}$$

Substituting this upper bound in the expression for  $J_{\text{GMM}}$  and rearranging, we get

$$\begin{aligned} 0 &\leq J_{\text{OT}} - J_{\text{GMM}} \\ &\leq \int_0^1 \int_{\mathbb{R}^d} \sum_{i,j} \lambda_{ij} \rho_{t|i,j} \|u_{t|i,j}(x) - u_t(x)\|^2 dx dt \\ &\leq \int_0^1 \int_{\mathbb{R}^d} \sum_{i,j} \sum_{\substack{i' \neq i \\ j' \neq j}} \|u_{t|i,j} - u_{t|i',j'}\|^2 \frac{\lambda_{i',j'} \lambda_{ij} \rho_{t|i',j'} \rho_{t|i,j}}{\rho_t} dx dt \\ &\leq \int_0^1 \int_{\mathbb{R}^d} \sum_{i,j} \sum_{\substack{i' \neq i \\ j' \neq j}} \|u_{t|i,j} - u_{t|i',j'}\|^2 \min\{\lambda_{ij} \rho_{t|i,j}, \lambda_{i',j'} \rho_{t|i',j'}\} dx dt, \end{aligned}$$

where the last inequality comes from the inequality  $\frac{a_i a_j}{\sum_i a_i} \leq \min(a_i, a_j)$  for all positive numbers  $\{a_i\}_{i=1}^N$ . This completes the proof.  $\square$

Letting

$$Q = \frac{\int \min\{\lambda_{ij}\rho_{t|ij}, \lambda_{i'j'}\rho_{t|i'j'}\} dt}{\iint \min\{\lambda_{ij}\rho_{t|ij}, \lambda_{i'j'}\rho_{t|i'j'}\} dx dt},$$

that is, the normalized distribution of the minimum of the densities  $\rho_{t|ij}, \rho_{t|i'j'}$ , and assuming that  $\mathbb{E}_Q[\|u_{t|ij}(x) - u_{t|i'j'}(x)\|^2] < \infty$ , since the policies  $u_{t|ij}$  are affine with respect to  $x$ , we conclude that

$$J_{\text{OT}} - J_{\text{GMM}} \rightarrow 0 \quad \text{as} \quad \text{TV}(\rho_{t|ij}, \rho_{t|i'j'}) \rightarrow 1 \quad \forall i, j, i', j', (i, j) \neq (i', j'), \quad (\text{A.21})$$

where  $\text{TV}(\mu, \nu)$  denotes the total variation between two probability measures.

### A.6 Training and Inference complexity of GMMflow

In this section, we provide a computational complexity analysis of Algorithm 1 with respect to the number of components in each mixture and the problem dimension. The computational complexity of fitting a GMM using the EM algorithm scales as  $O(INK(D + D^2))$  (Pedregosa et al., 2011), where  $I$  is the number of EM iterations,  $N$  is the number of data points,  $K$  is the number of Gaussian components (modes), and  $D$  is the dimensionality of the data. Once the GMMs are fitted, solving a linear program with  $N_0 \times N_1$  variables, where  $N_0$  and  $N_1$  denote the number of modes in the input and output distributions, respectively. Modern solvers such as MOSEK (Mosek, 2020) efficiently solve LP problems using interior-point methods, which have a computational complexity of  $O(\sqrt{l}N^3)$  (Boyd & Vandenberghe, 2004), where  $l$  represents the number of constraints.

Regarding the computational complexity of inference, each evaluation of the GMMflow policy, i.e., equation (13), scales linearly with the number of components in each mixture and the SDE integration also scales linearly with the number of discretization time steps. In practice, when implementing the GMMflow policy, only a small number of GSB policies are computed since the component level transport plan  $\lambda_{ij}$  is sparse. Moreover, this computation is done in parallel for all conditional policies together. This results in very fast, practically constant-time inference regardless of the component number or problem dimension.

### A.7 Proof of Theorem 3

We start by noting that we can write the dynamical system (16b) in the form of (A.1) with

$$A_t = \begin{bmatrix} 0 & I \\ 0 & 0 \end{bmatrix}, \quad B_t = \begin{bmatrix} 0 \\ I \end{bmatrix}, \quad D_t = \begin{bmatrix} 0 \\ \sqrt{\epsilon}I \end{bmatrix}. \quad (\text{A.22})$$

Due to (19) the joint density of the phase space  $(x_t, v_t)$  is given by

$$\rho_t(x, v) = \sum_{\mathbf{i}} \lambda_{\mathbf{i}} \mathcal{N} \left( \begin{bmatrix} x \\ v \end{bmatrix}; \begin{bmatrix} \mu_{t|\mathbf{i}}^x \\ \mu_{t|\mathbf{i}}^v \end{bmatrix}, \begin{bmatrix} \Sigma_{t|\mathbf{i}}^{xx} & \Sigma_{t|\mathbf{i}}^{xv} \\ \Sigma_{t|\mathbf{i}}^{vx} & \Sigma_{t|\mathbf{i}}^{vv} \end{bmatrix} \right), \quad (\text{A.23})$$

We now note that for all  $j = 1, \dots, M$ , the position marginal  $x_{t_j}$  at time  $t_j$  is distributed as

$$x_{t_j} \sim \sum_{\mathbf{i}} \lambda_{\mathbf{i}} \mathcal{N}(\mu_{t_j|\mathbf{i}}^x, \Sigma_{t_j|\mathbf{i}}^{xx}) = \sum_{k=1}^{N_j} \sum_{\{\mathbf{i}: i_j=k\}} \lambda_{\mathbf{i}} \mathcal{N}(\mu_j^k, \Sigma_j^k) = \sum_{k=1}^{N_j} \alpha_j^k \mathcal{N}(\mu_j^k, \Sigma_j^k), \quad (\text{A.24})$$

and therefore the flow (19) satisfies the constraint (16c). Using a similar approach to the proof of Theorem 1, we will show that (18) produces the probability flow (19) by summing over all conditional GMSB flows. To facilitate notation, we will denote the phase space by  $z \in \mathbb{R}^{2d}$ , i.e.,  $z = [x; v]$ . Given that the individual policies  $u_{t|\mathbf{i}}$  solve the GMSB subproblems (10), the pair  $(\rho_{t|\mathbf{i}}, u_{t|\mathbf{i}})$  satisfies the FPK equation for the dynamical system (A.1), that is,

$$\frac{\partial \rho_{t|\mathbf{i}}}{\partial t} + \nabla \cdot (\rho_{t|\mathbf{i}} (Az + Bu_{t|\mathbf{i}})) - \frac{1}{2} \text{tr} (DD^\top \nabla^2 (\rho_{t|\mathbf{i}})) = 0. \quad (\text{A.25})$$

Multiplying equation (A.25) by  $\lambda_{\mathbf{i}}$  and summing over  $\mathbf{i}$ , we obtain

$$\sum_{\mathbf{i}} \lambda_{\mathbf{i}} \left[ \frac{\partial \rho_{t|\mathbf{i}}}{\partial t} + \nabla \cdot (\rho_{t|\mathbf{i}} (Az + Bu_{t|\mathbf{i}})) - \frac{1}{2} \text{tr} (DD^\top \nabla^2 (\rho_{t|\mathbf{i}})) \right] = 0, \quad (\text{A.26})$$

which implies that

$$\begin{aligned} \frac{\partial}{\partial t} \left( \sum_{\mathbf{i}} \rho_{t|\mathbf{i}} \lambda_{\mathbf{i}} \right) + \nabla \cdot \left( A z \sum_{\mathbf{i}} \rho_{t|\mathbf{i}} \lambda_{\mathbf{i}} + B \sum_{\mathbf{i}} u_{t|\mathbf{i}} \rho_{t|\mathbf{i}} \lambda_{\mathbf{i}} \right) \\ - \frac{1}{2} \text{tr} \left( D D^\top \nabla^2 \left( \sum_{\mathbf{i}} \rho_{t|\mathbf{i}} \lambda_{\mathbf{i}} \right) \right) = 0. \end{aligned} \quad (\text{A.27})$$

This can be further simplified as

$$\frac{\partial \rho_t}{\partial t} + \nabla \cdot \left( \rho_t \left( A z + B \sum_{\mathbf{i}} u_{t|\mathbf{i}} \frac{\rho_{t|\mathbf{i}} \lambda_{\mathbf{i}}}{\sum_{\mathbf{i}} \rho_{t|\mathbf{i}} \lambda_{\mathbf{i}}} \right) \right) - \frac{1}{2} \text{tr} (D D^\top \nabla^2 (\rho_t)) = 0, \quad (\text{A.28})$$

which yields that

$$\frac{\partial \rho_t}{\partial t} + \nabla \cdot (\rho_t (A z + B u_t)) - \frac{1}{2} \text{tr} (D D^\top \nabla^2 (\rho_t)) = 0. \quad (\text{A.29})$$

This completes the proof.

### A.8 Proof of Theorem 4

The proof is similar to that of Theorem 2. Substituting policy (18) to the cost (16a) we obtain

$$J_{\text{GMM}} = \mathbb{E}_{z_t \sim \rho_t} \left[ \int_0^1 \left\| \sum_{\mathbf{i}} u_{t|\mathbf{i}}(z_t) \frac{\rho_{t|\mathbf{i}}(z_t) \lambda_{\mathbf{i}}}{\sum_{\mathbf{i}} \rho_{t|\mathbf{i}}(z_t) \lambda_{\mathbf{i}}} \right\|^2 dt \right] \quad (\text{A.30a})$$

$$= \int_0^1 \int \rho_t(z) \left\| \sum_{\mathbf{i}} u_{t|\mathbf{i}}(z) \frac{\rho_{t|\mathbf{i}}(z) \lambda_{\mathbf{i}}}{\sum_{\mathbf{i}} \rho_{t|\mathbf{i}}(z) \lambda_{\mathbf{i}}} \right\|^2 dz dt \quad (\text{A.30b})$$

$$\leq \int_0^1 \int \rho_t(z) \frac{\sum_{\mathbf{i}} \|u_{t|\mathbf{i}}(z)\|^2 \rho_{t|\mathbf{i}}(z) \lambda_{\mathbf{i}}}{\sum_{\mathbf{i}} \rho_{t|\mathbf{i}}(z) \lambda_{\mathbf{i}}} dz dt \quad (\text{A.30c})$$

$$= \int_0^1 \int \sum_{\mathbf{i}} \|u_{t|\mathbf{i}}(z)\|^2 \rho_{t|\mathbf{i}}(z) \lambda_{\mathbf{i}} dz dt \quad (\text{A.30d})$$

$$= \sum_{\mathbf{i}} \lambda_{\mathbf{i}} \mathbb{E}_{z_t \sim \rho_{t|\mathbf{i}}} \left[ \int_0^1 \|u_{t|\mathbf{i}}(z_t)\|^2 dt \right] \quad (\text{A.30e})$$

$$= \sum_{\mathbf{i}} \lambda_{\mathbf{i}} J_{\mathbf{i}} = J_{\text{OT}}, \quad (\text{A.30f})$$

where (A.30b) is due to Fubini's theorem (Wheeden & Zygmund, 1977, Theorem 6.1) and (A.30c) makes use of the discrete version of Jensen's inequality (Wheeden & Zygmund, 1977, Theorem 7.35).

### A.9 Proof of Theorem 5

The proof is similar to the (discrete) GMM case. First, notice that

$$\rho_0 = \int_{\mathbb{R}^m \times \mathbb{R}^m} \rho_{0|w_0, w_1} d\Lambda(w_0, w_1) = \int_{\mathbb{R}^m} \mathcal{N}(\mu_0(w_0), \Sigma_0(w_0)) dP_0(w_0), \quad (\text{A.31})$$

$$\rho_1 = \int_{\mathbb{R}^m \times \mathbb{R}^m} \rho_{1|w_0, w_1} d\Lambda(w_0, w_1) = \int_{\mathbb{R}^m} \mathcal{N}(\mu_1(w_1), \Sigma_1(w_1)) dP_1(w_1). \quad (\text{A.32})$$

Next, notice that  $\rho_{t|w_0, w_1}$  and  $u_{t|w_0, w_1}$  satisfy the FPK equation:

$$\frac{\partial \rho_{t|w_0, w_1}}{\partial t} + \nabla \cdot (\rho_{t|w_0, w_1} (A_t x_t + B_t u_{t|w_0, w_1})) - \frac{1}{2} \text{tr} (D_t D_t^\top \nabla^2 (\rho_{t|w_0, w_1})) = 0. \quad (\text{A.33})$$

By taking the expectation with respect to the distribution  $\Lambda(w_0, w_1)$  in (A.33), we get

$$\begin{aligned} \int_{\mathbb{R}^m \times \mathbb{R}^m} \left[ \frac{\partial \rho_{t|w_0, w_1}}{\partial t} + \nabla \cdot (\rho_{t|w_0, w_1} (A_t x_t + B_t u_{t|w_0, w_1})) \right. \\ \left. - \frac{1}{2} \text{tr} (D_t D_t^\top \nabla^2 (\rho_{t|w_0, w_1})) \right] d\Lambda(w_0, w_1) = 0, \end{aligned} \quad (\text{A.34})$$

which implies that

$$\begin{aligned} & \frac{\partial}{\partial t} \int_{\mathbb{R}^m \times \mathbb{R}^m} \rho_{t|w_0, w_1} d\Lambda(w_0, w_1) \\ & + \nabla \cdot \left( A_t x_t \int_{\mathbb{R}^m \times \mathbb{R}^m} \rho_{t|w_0, w_1} d\Lambda(w_0, w_1) + B_t \int_{\mathbb{R}^m \times \mathbb{R}^m} u_{t|w_0, w_1} \rho_{t|w_0, w_1} d\Lambda(w_0, w_1) \right) \\ & - \frac{1}{2} \text{tr} \left( D_t D_t^\top \nabla^2 \left( \int_{\mathbb{R}^m \times \mathbb{R}^m} \rho_{t|w_0, w_1} d\Lambda(w_0, w_1) \right) \right) = 0, \end{aligned} \quad (\text{A.35})$$

which yields that

$$\begin{aligned} & \frac{\partial \rho_t}{\partial t} + \nabla \cdot \left( \rho_t \left( A_t x_t + B_t \int_{\mathbb{R}^m \times \mathbb{R}^m} u_{t|w_0, w_1} \frac{\rho_{t|w_0, w_1} d\Lambda(w_0, w_1)}{\int_{\mathbb{R}^m \times \mathbb{R}^m} \rho_{t|w_0, w_1} d\Lambda(w_0, w_1)} \right) \right) \\ & - \frac{1}{2} \text{tr} (D_t D_t^\top \nabla^2(\rho_t)) = 0. \end{aligned} \quad (\text{A.36})$$

Hence, we conclude that

$$\frac{\partial \rho_t}{\partial t} + \nabla \cdot (\rho_t (A_t x_t + B_t u_t)) - \frac{1}{2} \text{tr} (D_t D_t^\top \nabla^2(\rho_t)) = 0. \quad (\text{A.37})$$

#### A.10 Proof of Theorem 6

The proof is similar to the (discrete) GMM case. We can compute that

$$J_{\text{GMM}} = \mathbb{E}_{x_t \sim \rho_t} \left[ \int_0^1 \left\| \int_{\mathbb{R}^m \times \mathbb{R}^m} u_{t|w_0, w_1}(x) \frac{\rho_{t|w_0, w_1}(x) d\Lambda(w_0, w_1)}{\int_{\mathbb{R}^m \times \mathbb{R}^m} \rho_{t|w_0, w_1}(x) d\Lambda(w_0, w_1)} \right\|^2 dt \right] \quad (\text{A.38})$$

$$= \int_0^1 \int_{\mathbb{R}^n} \rho_t \left\| \int_{\mathbb{R}^m \times \mathbb{R}^m} u_{t|w_0, w_1}(x) \frac{\rho_{t|w_0, w_1}(x) d\Lambda(w_0, w_1)}{\int_{\mathbb{R}^m \times \mathbb{R}^m} \rho_{t|w_0, w_1}(x) d\Lambda(w_0, w_1)} \right\|^2 dx dt \quad (\text{A.39})$$

$$\leq \int_0^1 \int_{\mathbb{R}^n} \rho_t \frac{\int_{\mathbb{R}^m \times \mathbb{R}^m} \|u_{t|w_0, w_1}(x)\|^2 \rho_{t|w_0, w_1}(x) d\Lambda(w_0, w_1)}{\int_{\mathbb{R}^m \times \mathbb{R}^m} \rho_{t|w_0, w_1}(x) d\Lambda(w_0, w_1)} dx dt \quad (\text{A.40})$$

$$= \int_0^1 \int_{\mathbb{R}^n} \int_{\mathbb{R}^m \times \mathbb{R}^m} \|u_{t|w_0, w_1}(x)\|^2 \rho_{t|w_0, w_1}(x) d\Lambda(w_0, w_1) dx dt \quad (\text{A.41})$$

$$= \int_{\mathbb{R}^m \times \mathbb{R}^m} \mathbb{E}_{x \sim \rho_{t|w_0, w_1}} \left[ \int_0^1 \|u_{t|w_0, w_1}(x)\|^2 dt \right] d\Lambda(w_0, w_1). \quad (\text{A.42})$$

Hence, for any  $\Lambda \in \Pi(P_0, P_1)$ ,

$$J_{\text{GMM}} \leq \int_{\mathbb{R}^m \times \mathbb{R}^m} J(w_0, w_1) d\Lambda(w_0, w_1). \quad (\text{A.43})$$

By taking the infimum over  $\Lambda \in \Pi(P_0, P_1)$  in (A.43), we conclude that  $J_{\text{GMM}} \leq J_{\text{OT}}$ .

## B Continuous Gaussian Mixtures

Theorem 6 reduces the high-dimensional dynamic optimal transport problem (21) to the simpler, static OT problem (24) in the space of couplings between the parameter distributions, i.e.,  $\Pi(P_0, P_1)$ . Although in general, problem (24) is still difficult to solve, in many practical applications the parameter spaces  $w_0, w_1$  are one-dimensional and  $J(w_0, w_1)$  has a tractable closed form. Under these conditions, and provided the distributions  $P_0, P_1$  admit positive densities  $p_0, p_1$ , (24) can be solved in almost closed form (Santambrogio, 2015).

Our motivation for the extension to continuous mixtures stems from the fact that many heavy-tail distributions, such as the multivariate Student-t distribution and the alpha-stable distribution, can be expressed in the form of continuous Gaussian mixtures. In this context, one can use a generalized version of Theorems 1 and 2 to create tractable upper bounds on the 2-Wasserstein distance between such distributions and approximate the corresponding optimal transport map, displacement interpolation, and flow fields, respectively.

## B.1 Multivariate $t$ -Distribution

The Student- $t$  distribution has been used as a heavy-tailed alternative to the Gaussian distribution, as a generative prior distribution in diffusion models and related generative models in the recent literature; see e.g., [Kim et al. \(2024\)](#); [Pandey et al. \(2025\)](#); [Cordero-Encinar et al. \(2025\)](#). In this section, we will explore the use cases of Theorems 5 and 6 to the case of Student- $t$  boundary distributions.

To this end, let  $x_0, x_1$  follow  $d$ -dimensional multivariate  $t$ -distributions with parameters  $\nu_0, \mu_0, \Sigma_0$  and  $\nu_1, \mu_1, \Sigma_1$  respectively.<sup>2</sup>

A multivariate  $t$ -distribution can be viewed as a generalized Gaussian mixture model; see, for example, [Andrews & Mallows \(1974\)](#). More specifically, let  $u_0, u_1$  follow a gamma distribution,<sup>3</sup> i.e.,

$$u_0 \sim \text{Gamma}(\nu_0/2, \nu_0/2), \quad u_1 \sim \text{Gamma}(\nu_1/2, \nu_1/2), \quad (\text{B.2})$$

and conditional on  $u_0, u_1$ ,  $x_0 \sim \mathcal{N}(\mu_0, u_0^{-1}\Sigma_0)$  and  $x_1 \sim \mathcal{N}(\mu_1, u_1^{-1}\Sigma_1)$  respectively. Then,  $w_0^2 = u_0^{-1}$  follows the distribution  $\text{InverseGamma}(\nu_0/2, \nu_0/2)$  and  $w_1^2 = u_1^{-1}$  follows the distribution  $\text{InverseGamma}(\nu_1/2, \nu_1/2)$ , that is,  $w_0^2$  has the probability density function

$$\frac{(2/\nu_0)^{\nu_0/2}}{\Gamma(\nu_0/2)} (1/x)^{\frac{\nu_0}{2}+1} e^{-\frac{2}{\nu_0 x}}, \quad (\text{B.3})$$

and  $w_1^2$  has the probability density function

$$\frac{(2/\nu_1)^{\nu_1/2}}{\Gamma(\nu_1/2)} (1/x)^{\frac{\nu_1}{2}+1} e^{-\frac{2}{\nu_1 x}}. \quad (\text{B.4})$$

Let  $P_0, P_1, p_0, p_1$  the CDFs and PDFs of  $w_0, w_1$  respectively. Starting with the CDF of  $w_0$ , we have

$$P_0(x) = \mathbb{P}(w_0 \leq x) = \mathbb{P}(w_0^2 \leq x^2) = \int_0^{x^2} \frac{(2/\nu_0)^{\nu_0/2}}{\Gamma(\nu_0/2)} (1/y)^{\frac{\nu_0}{2}+1} e^{-\frac{2}{\nu_0 y}} dy = \frac{\Gamma(\frac{\nu_0}{2}, \frac{\nu_0}{2x^2})}{\Gamma(\frac{\nu_0}{2}, 0)}, \quad (\text{B.5})$$

which implies that  $w_0 \sim P_0$  has the probability density function

$$p_0(x) = \frac{d}{dx} \mathbb{P}(w_0 \leq x) = 2x \frac{(2/\nu_0)^{\nu_0/2}}{\Gamma(\nu_0/2)} (1/x^2)^{\frac{\nu_0}{2}+1} e^{-\frac{2}{\nu_0 x^2}} = \frac{2(2/\nu_0)^{\nu_0/2}}{\Gamma(\nu_0/2)} (1/x)^{\nu_0+1} e^{-\frac{2}{\nu_0 x^2}}. \quad (\text{B.6})$$

Similarly,  $w_1 \sim P_1$  has a CDF given by

$$P_1(x) = \frac{\Gamma(\frac{\nu_1}{2}, \frac{\nu_1}{2x^2})}{\Gamma(\frac{\nu_1}{2}, 0)}, \quad (\text{B.7})$$

and a PDF given by

$$p_1(x) = \frac{2(2/\nu_1)^{\nu_1/2}}{\Gamma(\nu_1/2)} (1/x)^{\nu_1+1} e^{-\frac{2}{\nu_1 x^2}}. \quad (\text{B.8})$$

With equations (B.5)-(B.8) in mind, consider Problem (21) with Student- $t$  distributions with parameters  $\nu_0, \mu_0, \Sigma_0$  and  $\nu_1, \mu_1, \Sigma_1$ , that is, continuous mixtures of the form

$$\rho_0(x) = \int \mathcal{N}(x; \mu_0, w_0^2 \Sigma_0) p_0(w_0) dw_0, \quad (\text{B.9a})$$

$$\rho_1(x) = \int \mathcal{N}(x; \mu_1, w_1^2 \Sigma_1) p_1(w_1) dw_1, \quad (\text{B.9b})$$

<sup>2</sup>The density of a multivariate  $t$ -distribution with  $\nu$  degrees of freedom, and scale and location parameters  $\mu, \Sigma$  respectively, is given by

$$\frac{\Gamma((\nu+d)/2)}{\Gamma(\nu/2) \nu^{d/2} \pi^{d/2} |\Sigma|^{1/2}} \left[ 1 + \frac{1}{\nu} (x - \mu)^\top \Sigma^{-1} (x - \mu) \right]^{-(\nu+d)/2}. \quad (\text{B.1})$$

<sup>3</sup>Here  $\text{Gamma}(a, b)$  denotes a gamma distribution with probability density functional proportional to  $x^{a-1} e^{-bx}$  where  $a$  is the shape parameter and  $b$  is the inverse scale parameter.



where  $p_0(w_0), p_1(w_1)$  are given by (B.6) and (B.8) respectively.

Considering noise-free dynamics to simplify the respective formulas, as in (21b), the  $(w_0, w_1)$ -GSB for the boundary distribution parametrization (B.9), admits the following closed form

$$\Sigma_{t|w_0, w_1} = (1-t)^2 w_0^2 \Sigma_0 + t^2 w_1^2 \Sigma_1 + (1-t)t w_0 w_1 (C + C^\top), \quad (\text{B.10a})$$

$$\mu_{t|w_0, w_1} = (1-t)\mu_0 + t\mu_1, \quad (\text{B.10b})$$

$$K_{t|w_0, w_1} = S_t^\top \Sigma_t^{-1}, \quad (\text{B.10c})$$

$$v_{t|w_0, w_1} = \mu_1 - \mu_0, \quad (\text{B.10d})$$

$$S_{t|w_0, w_1} = t(\Sigma_1 - C^\top) - (1-t)(\Sigma_0 - C), \quad (\text{B.10e})$$

where  $C = \Sigma_0^{\frac{1}{2}} D \Sigma_0^{-\frac{1}{2}}$ ,  $D = (\Sigma_0^{\frac{1}{2}} \Sigma_1 \Sigma_0^{\frac{1}{2}})^{\frac{1}{2}}$ . Equations (B.10) yield

$$\rho_{t|w_0, w_1}(x) = \mathcal{N}(x; \mu_{t|w_0, w_1}, \Sigma_{t|w_0, w_1}), \quad (\text{B.11a})$$

$$u_{t|w_0, w_1}(x) = K_{t|w_0, w_1}(x - \mu_{t|w_0, w_1}) + \mu_1 - \mu_0. \quad (\text{B.11b})$$

Furthermore, the optimal cost  $J(w_0, w_1)$  in (24) can be calculated using (9) and equals

$$J(w_0, w_1) = \|\mu_0 - \mu_1\|^2 + w_0^2 \text{tr}(\Sigma_0) + w_1^2 \text{tr}(\Sigma_1) - 2w_0 w_1 \text{tr}(D). \quad (\text{B.12})$$

Focusing on problem (24), it is known that when the transport cost has the form  $J(w_0, w_1) = h(w_0 - w_1)$  where  $h$  is a convex function, the corresponding optimal transport plan is given by (Santambrogio, 2015, Theorem 2.9)

$$\Lambda^*(w_0, w_1) = (P_0^{-1}(x), P_1^{-1}(x))_{\#} \text{Unif}([0, 1]), \quad (\text{B.13})$$

where  $\text{Unif}([0, 1])$  is the uniform measure over the set  $[0, 1]$ , and  $P_0^{-1}, P_1^{-1}$  are the corresponding inverse CDFs of (B.5), (B.7). The cost function (B.12), does not satisfy this condition, since it cannot be written as a perfect square for general scaling matrices  $\Sigma_0, \Sigma_1$ . We resolve this issue through the following proposition.

**Proposition 3.** *When solving the OT problem (24), the transport cost (B.12) and the cost function  $\tilde{J}(w_0, w_1) = |w_0 - w_1|^2$  are equivalent, i.e., they result in the same optimal coupling  $\Lambda^*$ .*

*Proof.* Equation (B.12) can be written in the form:

$$J(w_0, w_1) = \|\mu_0 - \mu_1\|^2 + w_0^2 \text{tr}(\Sigma_0 - D) + w_1^2 \text{tr}(\Sigma_1 - D) + |w_0 - w_1|^2 \text{tr}(D). \quad (\text{B.14})$$

In (B.14), the terms  $\|\mu_0 - \mu_1\|^2$ ,  $w_0^2 \text{tr}(\Sigma_0 - D)$ ,  $w_1^2 \text{tr}(\Sigma_1 - D)$  do not contribute to the optimization problem in (24), since they are constant for any feasible transport plan  $\Lambda \in \Pi(\rho_0, \rho_1)$  due to the fixed boundary distributions. By dropping these terms, as well as the positive scaling constant  $\text{tr}(D)$ , we obtain the desired result.  $\square$

Equation (B.13) implies that the optimal value for Problem (24) is given by

$$J_{\text{OT}}^* = \int_0^1 J(P_0^{-1}(w), P_1^{-1}(w)) dw, \quad (\text{B.15})$$

while the optimal control policy  $u_t^*(x)$  and the respective density  $\rho_t^*(x)$  resulting from substituting to the optimal transport plan  $\Lambda^*$  to the formulas (22) and (5) of Theorem 5 are given by

$$\rho_t^*(x) = \int_0^1 \rho_{t|P_0^{-1}(w), P_1^{-1}(w)}(x) dw, \quad (\text{B.16a})$$

and

$$u_t^*(x) = \int_0^1 u_{t|P_0^{-1}(w), P_1^{-1}(w)}(x) \frac{\rho_{t|P_0^{-1}(w), P_1^{-1}(w)}(x)}{\rho_t^*(x)} dw. \quad (\text{B.17})$$

Since equations (B.15)-(B.17) involve only one-dimensional integrals, they can be easily computed numerically using a quadrature. Although  $P_0^{-1}, P_1^{-1}$  are not available in closed form, they can be

obtained in most scientific computing packages such as `scipy` (Virtanen et al., 2020) by properly scaling the quantile function of the inverse gamma distribution.

To illustrate this approach, we calculate the upper bound (B.15) and the true Wasserstein-2 distance for a one-dimensional problem between two Student-t distributions with parameters  $\mu_1 = \mu_2 = 0$ ,  $\Sigma_1 = 1$ ,  $\Sigma_2 = \{0.25, 1, 4\}$ ,  $\nu_1 = 3$  for various values of  $\nu_2 \in [2.5, 10]$  and report the results in Figure 5. We note that our approach works for arbitrary Student-t distributions in any dimension, however, we study the 1D case in this example to be able to calculate the exact Wasserstein distance and quantify the tightness of our upper bound. Although rigorously studying the tightness of the bound (B.15) remains an open problem, as evident in Figure 5, it closely approximates the true Wasserstein distance, at-least in this simple 1D scenario.

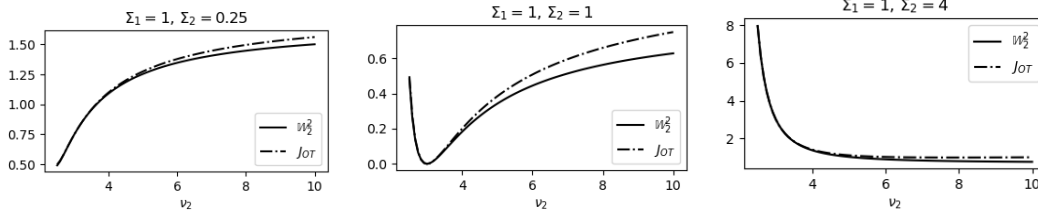

Figure 5: Comparison between true Wasserstein distance and upper bound (B.15) for 1D Student-t distributions.

We believe this result, along with the policy (B.17) and the interpolation (B.16), could be useful tools in developing simulation-free methods for training diffusion models with heavy-tail prior distributions, or for creating tractable OT flows between mixtures of Student-t distributions. We leave these interesting directions as future work, since they are not immediately related to computationally inexpensive diffusion model training, which is the main theme of the rest of this paper.

## C Additional Experiments and Implementation Details

### C.1 Additional Details on 2D Problems

To compare our approach for the problem of Figure 1 with state-of-the-art neural SB solvers we used the original implementations of the DSB<sup>4</sup> (De Bortoli et al., 2021) and DSBM<sup>5</sup> (Shi et al., 2023). The network architecture used for both algorithms is the fully connected DNN of De Bortoli et al. (2021) with 128-dimensional sinusoidal temporal encodings, 256 neurons in the encoder layer, {256, 256} neurons in the decoder layers, and SiLU activation functions (Hendrycks & Gimpel, 2016). We run all algorithms and report the results in Table 4. For the zero noise case, i.e.,  $\epsilon = 0$ , DSB and DSBM are not applicable, so we approximate the true OT cost using discrete optimal transport, calculated using the POT library (Flamary et al., 2021), using 10,000 samples from each distribution. As evident from Table 4, although the DSB and DSBM algorithms can approximate the true SB cost, they fail to retrieve the true optimal solution for larger values of the noise parameter, due to their non-convex loss functions.

Table 4: Transport cost comparison for the problem in Figure 1

| $\epsilon$ | $J_{OT}$ (12a) | $J_{GMM}$ (15a) | DSBM   | DSB    | OT    |
|------------|----------------|-----------------|--------|--------|-------|
| 0          | 100.06         | 89.45           | -      | -      | 84.87 |
| 0.1        | 100.15         | 89.32           | 84.26  | 98.62  | -     |
| 1          | 102.28         | 89.28           | 131.50 | 100.82 | -     |
| 10         | 162.13         | 116.60          | 133.04 | 244.31 | -     |

Furthermore, regarding the example problem in Figure 2, we provide additional details about the approximation of the boundary distributions as mixture models in Figure 6.

### C.2 Image-to-Image Translation Details

To better evaluate the performance of the proposed approach in the Image-to-Image translation task, we provide further examples in Figures 9 and 10 as well as approximate training and inference times

<sup>4</sup>[https://github.com/JTT94/diffusion\\_schrodinger\\_bridge](https://github.com/JTT94/diffusion_schrodinger_bridge)

<sup>5</sup><https://github.com/yuyang-shi/dsbm-pytorch>

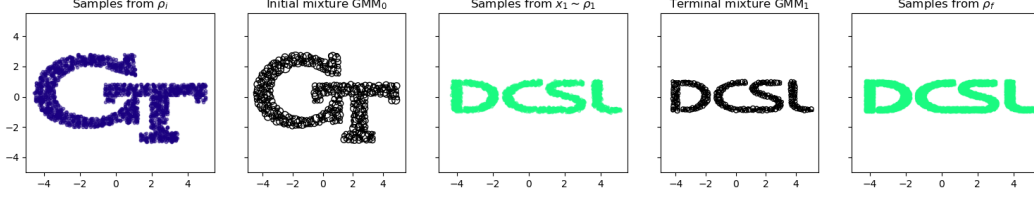

Figure 6: GT to DCSL distribution steering details.

for our approach, and compare them with the training and inference times of LightSB in Table 5. For our approach, training time consists of the time required to fit the GMMs in the latents of the FFHQ dataset for the two boundary distributions, and the solution of the linear program (15). As inference time, we consider the time taken for the integration of the SDE (or ODE for  $\epsilon = 0$ ) (12b) with the mixture policy (13). We observe that while inference time is small for solving the deterministic (optimal transport) problem, i.e., for  $\epsilon = 0$ , integrating the stochastic dynamical system for positive values of  $\epsilon$  requires more time due to the small time step required for SDE integration. The quality of the produced images was not found to be affected by this parameter, implying that  $\epsilon = 0$  could be used for fast, deterministic inference, while a positive value of  $\epsilon$  will allow for some randomness in the generated images. We also note that the faster training time for our approach is mainly due to the very fast convergence of the EM algorithm, which is also less likely to converge to local minima, compared to the standard maximum likelihood method for fitting distribution to data. All tests were conducted on a desktop computer with an RTX 3070 GPU.

Table 5: Training and inference time comparison with state of the art. Inference time is measured for a batch of 10 images and uses GPU parallelization for calculating the elementary GSB policies of the mixture policy (13).

|                      | Training [s] | Inference ( $\epsilon = 0$ ) [s], | Inference ( $\epsilon = 0.1$ ) [s] |
|----------------------|--------------|-----------------------------------|------------------------------------|
| LightSB <sup>6</sup> | 57           | -                                 | 0.02                               |
| Ours                 | 17           | 0.06                              | 0.2                                |

### C.3 Multi-Marginal Problems Details

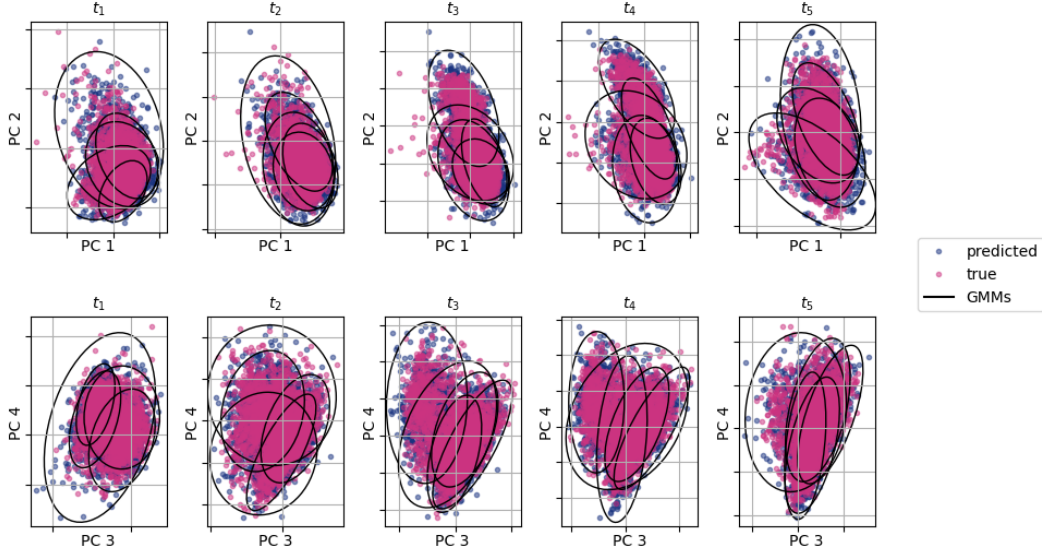

Figure 7: Additional visualization of results in 5-d scRNA problem: predicted vs true distributions for all time-marginals overlayed with the 3-sigma bound for each Gaussian component of the pre-fitted GMMs.

<sup>6</sup>Korotin et al. (2024)

**Solution times.** To solve each multi-marginal GMSB we use the semidefinite formulation detailed in Section D and used Mosek (2020) to solve the resulting semidefinite program. Specifically, we assume the GMMs between the five temporal marginals are spaced 1 time unit apart, resulting in a problem horizon of 4 time units. We use a coarse temporal discretization with time-step  $\Delta t = 0.1$  (i.e., 10 time steps between  $[t_i, t_{i+1}]$ ) to evaluate the cost tensor for the optimization problem (20) and a fine resolution discretization of  $\Delta t = 0.01$  for the final policy calculation, solving only for the GMSBs with non-zero transport parameter  $\lambda_i$ . There are a total of 3,125 combinations of GMSBs for this problem, and the computation of each one using the coarse time grid takes roughly 0.35 s on an Intel i7 12-th generation CPU with 32 GB of RAM memory, giving a total of 18.5 minutes of calculations, if all GMSBs are solved serially. This computational overhead can be greatly decreased if the GMSBs are solved in parallel. In our setup, we parallelized the calculation using MOSEK’s built-in capabilities and solved them in batches of 12, using 2 CPU threads per problem. This brought down the total calculation time under 6 minutes. For the final policy calculation, there are only 21 active GMSBs in the mixture policy (18), each taking 6 seconds to compute. The total run time for our algorithm for this problem, adds up to 8 minutes for this problem, which is considerably lower than the corresponding neural methods (24 minutes on GPU for the DMSB algorithm (Chen et al., 2023)).

**Velocity inference.** After calculating the conditional GMSBs and solving (4), the marginal mixture distribution for the entire phase-space is fully defined for the entire time horizon of the problem through Equation (19). Given a position sample  $x_0$  at time  $t = 0$ , the corresponding velocity component can be inferred using conditional GMM sampling. Specifically, considering that the joint distribution of the phase space at time  $t$  is

$$\rho_t(x, v) = \sum_i \lambda_i \mathcal{N} \left( \begin{bmatrix} x \\ v \end{bmatrix} ; \begin{bmatrix} \mu_{t|i}^x \\ \mu_{t|i}^v \end{bmatrix}, \begin{bmatrix} \Sigma_{t|i}^{xx} & \Sigma_{t|i}^{xv} \\ \Sigma_{t|i}^{vx} & \Sigma_{t|i}^{vv} \end{bmatrix} \right), \quad (\text{B.18})$$

it is easy to show that the density of  $\rho_t(v|x)$  is also a Gaussian Mixture Model, since

$$\rho_t(v|x) = \frac{\rho_t(x, v)}{\rho_t(x)} \quad (\text{B.19a})$$

$$= \frac{\sum_i \lambda_i \mathcal{N} \left( \begin{bmatrix} x \\ v \end{bmatrix} ; \begin{bmatrix} \mu_{t|i}^x \\ \mu_{t|i}^v \end{bmatrix}, \begin{bmatrix} \Sigma_{t|i}^{xx} & \Sigma_{t|i}^{xv} \\ \Sigma_{t|i}^{vx} & \Sigma_{t|i}^{vv} \end{bmatrix} \right)}{\sum_i \lambda_i \mathcal{N} \left( x; \mu_{t|i}^x, \Sigma_{t|i}^{xx} \right)} \quad (\text{B.19b})$$

$$= \frac{\sum_i \lambda_i \mathcal{N} \left( v; \mu_{t|i}^{v|x}, \Sigma_{t|i}^{v|x} \right) \mathcal{N} \left( x; \mu_{t|i}^x, \Sigma_{t|i}^{xx} \right)}{\sum_i \lambda_i \mathcal{N} \left( x; \mu_{t|i}^x, \Sigma_{t|i}^{xx} \right)} \quad (\text{B.19c})$$

$$= \sum_i \frac{\lambda_i \mathcal{N} \left( x; \mu_{t|i}^x, \Sigma_{t|i}^{xx} \right)}{\sum_i \lambda_i \mathcal{N} \left( x; \mu_{t|i}^x, \Sigma_{t|i}^{xx} \right)} \mathcal{N} \left( v; \mu_{t|i}^{v|x}, \Sigma_{t|i}^{v|x} \right), \quad (\text{B.19d})$$

where Equation (B.19a) is due to the Bayes rule, with (Bishop & Nasrabadi, 2006)

$$\mu_{t|i}^{v|x} = \mu_{t|i}^v + \Sigma_{t|i}^{vx} \left( \Sigma_{t|i}^{xx} \right)^{-1} \left( x - \mu_{t|i}^x \right),$$

and

$$\Sigma_{t|i}^{v|x} = \Sigma_{t|i}^{vv} - \Sigma_{t|i}^{vx} \left( \Sigma_{t|i}^{xx} \right)^{-1} \Sigma_{t|i}^{xv}.$$

For our problem, we use Equation (B.19d) to sample the initial velocity of a new sample given its initial position, and then use the joint position-velocity initial conditions to calculate the sample’s trajectory by integrating (12b).

**Visualization of results.** To better visualize our results, we provide more information about the predicted distributions in Figure 7, overlaid with the pre-fitted GMMs at each time step. It is easy to visually confirm that the 5-component mixtures capture the marginal distributions in all time-steps accurately, and since our method is exact, there is minimal distribution mismatch in the predicted marginals, as confirmed quantitatively by the indices in Table 3.

#### C.4 Performance on EOT Benchmarks

To further evaluate the optimality of the proposed approach, we tested the algorithm on the Entropic Optimal Transport benchmark detailed in [Gushchin et al. \(2023\)](#). The benchmark provides a pair of boundary test distributions  $\rho_0, \rho_1$ , where  $\rho_0$  is a scaled Gaussian distribution and  $\rho_1$  is a mixture-like distribution that is easy to sample from, and an optimal conditional transport plan  $\pi^*(x_1|x_0)$ , which is a Gaussian Mixture Model and is known in closed form. For the pair  $\rho_0, \rho_1$ , the optimal policy solving (2) can be calculated explicitly, allowing direct comparisons with our approach. The metric we use to measure the optimality of our approach is the Bures-Wasserstein Unexplained Variance Percentage (cBW-UV) ([Gushchin et al., 2023](#)), defined by

$$\text{cBW-UV}(\hat{\pi}, \pi^*) \triangleq \frac{100\%}{\frac{1}{2}\text{Var}(\rho_1)} \int \text{BW}_2^2(\hat{\pi}(x_1|x_0) \parallel \pi^*(x_1|x_0)) \rho_0(x_0) dx_0, \quad (\text{B.20})$$

which measures the distance between conditional transport plans, evaluated using the Bures-Wasserstein metric.

To use the method of [Gushchin et al. \(2023\)](#), we first obtain samples from the two boundary test distributions and then fit mixture models on them using EM. We then deploy policy (13), and report the values of the cBW-UV index between the known optimal conditional transport plan  $\pi^*(x_1|x_0)$ , and the conditional transport plan resulting from the integration of the policy (13), denoted  $\hat{\pi}(x_1|x_0)$ . We use 1,000 initial condition samples  $x_0$ , and for each sample, we draw 1,000  $x_1$  samples from the distributions  $\pi^*(x_1|x_0)$  and  $\hat{\pi}(x_1|x_0)$  to compute the empirical Bures-Wasserstein distance in (B.20). The results are reported in Table 6 for problems of various dimensions and noise levels, along with many other available methods for solving the same problem ([Gushchin et al., 2023](#), Table 5). We note that although our approach requires virtually no training compared to computationally expensive neural OT and SB approaches, it outperforms many of these algorithms, outlining its excellent performance in problems where GMMs accurately capture the marginal distributions of the problem.

Table 6: Comparisons of cBW<sub>2</sub>-UV  $\downarrow$  (%) between the optimal plan  $\pi^*$  and the learned plan  $\hat{\pi}$ . **Colors** indicate the ratio of the metric to the *independent baseline* metric: ratio  $\leq 0.2$ , ratio  $\in (0.2, 0.5)$ , ratio  $> 0.5$ .

|                          | $\epsilon = 0.1$ |        |         |         | $\epsilon = 1$ |        |        |         | $\epsilon = 10$ |        |        |         |
|--------------------------|------------------|--------|---------|---------|----------------|--------|--------|---------|-----------------|--------|--------|---------|
|                          | $D=2$            | $D=16$ | $D=64$  | $D=128$ | $D=2$          | $D=16$ | $D=64$ | $D=128$ | $D=2$           | $D=16$ | $D=64$ | $D=128$ |
| [LSOT]                   | -                | -      | -       | -       | -              | -      | -      | -       | -               | -      | -      | -       |
| [SCONES]                 | -                | -      | -       | -       | 34.88          | 71.34  | 59.12  | 136.44  | 32.9            | 50.84  | 60.44  | 52.11   |
| [NOT]                    | 1.94             | 13.67  | 11.74   | 11.4    | 4.77           | 23.27  | 41.75  | 26.56   | 2.86            | 4.57   | 3.41   | 6.56    |
| [EgNOT]                  | 129.8            | 75.2   | 60.4    | 43.2    | 80.4           | 74.4   | 63.8   | 53.2    | 4.14            | 2.64   | 2.36   | 1.31    |
| [ENOT]                   | 3.64             | 22     | 13.6    | 12.6    | 1.04           | 9.4    | 21.6   | 48      | 1.4             | 2.4    | 19.6   | 30      |
| [MLE-SB]                 | 4.57             | 16.12  | 16.1    | 17.81   | 4.13           | 9.08   | 18.05  | 15.226  | 1.61            | 1.27   | 3.9    | 12.9    |
| [DiffSB]                 | 73.54            | 59.7   | 1386.4  | 1683.6  | 33.76          | 70.86  | 53.42  | 156.46  | -               | -      | -      | -       |
| [FB-SDE-A]               | 86.4             | 53.2   | 1156.82 | 1566.44 | 30.62          | 63.48  | 34.84  | 131.72  | -               | -      | -      | -       |
| [FB-SDE-J]               | 51.34            | 89.16  | 119.32  | 173.96  | 29.34          | 69.2   | 155.14 | 177.52  | -               | -      | -      | -       |
| [DSBM]                   | 5.2              | 16.8   | 37.3    | 35      | 0.3            | 1.1    | 9.7    | 31      | 3.7             | 105    | 3557   | 15000   |
| [SF <sup>2</sup> M-Sink] | 0.54             | 3.7    | 9.5     | 10.9    | 0.2            | 1.1    | 9      | 23      | 0.31            | 4.9    | 319    | 819     |
| [LightSB]                | 0.03             | 0.08   | 0.28    | 0.60    | 0.05           | 0.09   | 0.24   | 0.62    | 0.07            | 0.11   | 0.21   | 0.37    |
| [LightSB-M (MB)]         | 0.005            | 0.07   | 0.27    | 0.63    | 0.002          | 0.04   | 0.12   | 0.36    | 0.04            | 0.07   | 0.11   | 0.23    |
| [GMMflow (ours)]         | 10.35            | 14.68  | 11.15   | 11.2    | 5.78           | 7.20   | 6.93   | 6.38    | 0.16            | 0.28   | 1.43   | 2.77    |
| Independent coupling     | 166.0            | 152.0  | 126.0   | 110.0   | 86.0           | 80.0   | 72.0   | 60.0    | 4.2             | 2.52   | 2.26   | 2.4     |

To further benchmark our algorithm with respect to run-times, we provide wall-clock times for both training and inference with respect to the number of components and the problem dimensionality for the boundary distributions provided in the EOT benchmark. We report these values in Table 7 below.

Table 7: Training time for for EOT benchmark.

| Dim \ # comp | 5      | 10     | 20     | 50     | 100    |
|--------------|--------|--------|--------|--------|--------|
| 2            | 0.209  | 0.0595 | 0.1083 | 0.2303 | 1.0256 |
| 16           | 0.0567 | 0.0948 | 0.1413 | 0.4218 | 3.3918 |
| 64           | 0.182  | 0.2228 | 0.7217 | 1.2875 | 2.1431 |
| 128          | 0.2802 | 0.4562 | 0.7713 | 1.6164 | 3.4101 |

Table 8: Inference time for for EOT benchmark.

| Dim \ # comp | 5     | 10    | 20    | 50    | 100   |
|--------------|-------|-------|-------|-------|-------|
| 2            | 0.037 | 0.031 | 0.031 | 0.032 | 0.030 |
| 16           | 0.032 | 0.032 | 0.032 | 0.033 | 0.032 |
| 64           | 0.032 | 0.032 | 0.032 | 0.032 | 0.039 |
| 128          | 0.032 | 0.033 | 0.036 | 0.032 | 0.082 |

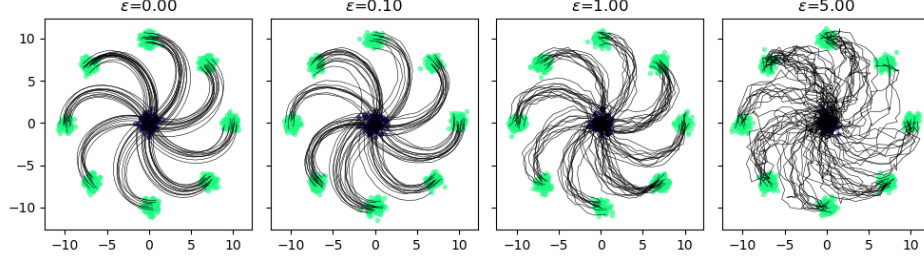

Figure 8: Gaussian to 8-Gaussians with LTI prior dynamics.

We note that because the EOT benchmark uses an initial Gaussian distribution and a GMM terminal distribution, there is no point in reporting metrics such as marginal distribution accuracy or transport plan optimality, since these will perform best when the number of components used in GMMflow matches the setting of EOT benchmark. Furthermore, exploring how well a GMM approximates a general distribution as the number of components increases is a well-studied problem and goes beyond the scope of our work; therefore, we do not provide experiments that explore this issue.

### C.5 Problems with LTI Prior Dynamics

To test the algorithm on more complicated dynamical systems, we use the 4-dimensional Linear Time-Invariant (LTI) system

$$dx_t = Ax_t dt + Bu_t dt + D dw, \quad (\text{B.21})$$

with

$$A = \begin{bmatrix} 2S & I_2 \\ S & 0_2 \end{bmatrix}, \quad S = \begin{bmatrix} 0 & -1 \\ 1 & 0 \end{bmatrix}, \quad B = \begin{bmatrix} 0 \\ I_2 \end{bmatrix}, \quad D = \epsilon I_4,$$

and boundary distributions

$$\rho_0 = \sum_{k=0}^7 \frac{1}{8} \mathcal{N}([10 \cos(k\pi/4); 10 \sin(k\pi/4); 0; 0], 0.4I_4), \quad (\text{B.22a})$$

$$\rho_1 = \mathcal{N}(0_4, 0.4I_4). \quad (\text{B.22b})$$

We note that solving problem (12) with the dynamical system (B.21) in place of (12b) is not currently solvable using any mainstream neural SB solvers because the stochastic disturbance  $dw$  in (B.21) does not enter through the same channels as the control signal  $u_t$  and the state  $x_t$ . The only available method to solve this problem is detailed in Chen et al. (2016), which, however, assumes access to the solution of the static EOT problem (1) with boundary distributions (B.22), and a closed form of the probability density transition kernel included by the dynamical system (B.21) for  $u_t \equiv 0$ . The results of our approach are illustrated in Figure 8.

To solve the Gaussian Bridge sub-problems with a dynamical system of the form (B.21) we use the discrete-time convex formulation of Rapakoulias & Tsiotras (2023). We also include a brief overview of the method in Appendix D. Each continuous-time Gaussian Bridge is discretized (in the temporal dimension) into 101 steps over uniform intervals of size  $\Delta t = 0.01$ . We used MOSEK (Mosek, 2020) to solve the resulting semidefinite programs.



## D Gaussian Bridge for Linear Time-Varying Systems

In this section, we briefly review the available methods in the literature to solve the Gaussian Bridge problem with general LTV dynamics of the form (A.1). That is, we consider the problem

$$\min_{u \in \mathcal{U}} \mathbb{E} \left[ \int_0^1 \|u_t(x)\|^2 dt \right], \quad (\text{C.1a})$$

$$dx_t = A_t x_t dt + B_t u(x_t) dt + D_t dw, \quad (\text{C.1b})$$

$$x_0 \sim \mathcal{N}(\mu_0, \Sigma_0), \quad x_1 \sim \mathcal{N}(\mu_1, \Sigma_1). \quad (\text{C.1c})$$

The solution of problem (C.1) is used to solve the Gaussian Bridge problem for the example in Section C.5 and is relevant to applications with prior dynamics of more general structure such as mean field games (Bensoussan et al., 2016) and large multi-agent control applications (Saravanos et al., 2023) or higher-order distribution interpolation problems (Chen et al., 2018, 2019). The existence and uniqueness of solutions for problem (C.1) are studied in Chen et al. (2015a); Liu et al. (2025); Liu & Tsiotras (2024). Since the state of (C.1b) remains Gaussian throughout the steering horizon, i.e.,  $x_t \sim \mathcal{N}(\mu_t, \Sigma_t)$ , the problem simplifies to that of the control of the first two statistical moments of the state, namely the mean  $\mu_t$  and the covariance  $\Sigma_t$ . Using a control policy parametrization of the form

$$u_t(x) = K_t(x - \mu_t) + v_t, \quad (\text{C.2})$$

allows for the decoupling of the propagation equations for the mean and covariance of the state. More specifically, applying (C.2) to (C.1b), the equations describing the propagation of  $\mu_t$  and  $\Sigma_t$  yield (Särkkä & Solin, 2019, Section 5.5)

$$\dot{\Sigma}_t = (A_t + B_t K_t) \Sigma_t + \Sigma_t (A_t + B_t K_t)^\top + D_t D_t^\top, \quad (\text{C.3a})$$

$$\dot{\mu}_t = A_t \mu_t + B_t v_t. \quad (\text{C.3b})$$

Expanding the expression (C.3a) and performing the change of variables  $U_t = K_t \Sigma_t$ , we obtain

$$\dot{\Sigma}_t = A_t \Sigma_t + \Sigma_t A_t^\top + B_t U_t + U_t^\top B_t^\top + D_t D_t^\top, \quad (\text{C.4})$$

which is linear in  $U_t, \Sigma_t$ . Furthermore, substituting (C.2) into the cost function (C.1a) and using the cyclic property of the trace operator along with the standard properties of the expectation yields

$$\mathbb{E} \left[ \int_0^1 \|u_t(x)\|^2 dt \right] = \int_0^1 v_t^\top v_t + \text{tr} (K_t \Sigma_t K_t^\top) dt = \int_0^1 v_t^\top v_t + \text{tr} (U_t \Sigma_t^{-1} U_t^\top) dt. \quad (\text{C.5})$$

Equations (C.3b), (C.4), (C.5) can be used to reformulate problem (C.1) to a simpler optimization problem in the space of affine feedback policies, parameterized by  $U_t$  and  $v_t$ . To be more precise, problem (C.1) reduces to

$$\min_{\mu_t, v_t, \Sigma_t, U_t} \int_0^1 v_t^\top v_t + \text{tr} (U_t \Sigma_t^{-1} U_t^\top) dt, \quad (\text{C.6a})$$

$$\dot{\Sigma}_t = A_t \Sigma_t + \Sigma_t A_t^\top + B_t U_t + U_t^\top B_t^\top + D_t D_t^\top, \quad (\text{C.6b})$$

$$\dot{\mu}_t = A_t \mu_t + B_t v_t, \quad (\text{C.6c})$$

which can be further relaxed to a convex semi-definite program using the lossless convex relaxation (Chen et al., 2015b)

$$\min_{\mu_t, v_t, \Sigma_t, U_t} \int_0^1 v_t^\top v_t + \text{tr}(Y_t) dt, \quad (\text{C.7a})$$

$$U_t \Sigma_t^{-1} U_t^\top \preceq Y_t, \quad (\text{C.7b})$$

$$\dot{\Sigma}_t = A_t \Sigma_t + \Sigma_t A_t^\top + B_t U_t + U_t^\top B_t^\top + D_t D_t^\top, \quad (\text{C.7c})$$

$$\dot{\mu}_t = A_t \mu_t + B_t v_t, \quad (\text{C.7d})$$

after noting that the constraint (C.7b) can be cast as a Linear Matrix Inequality (LMI) using Schur's complement as

$$\begin{bmatrix} \Sigma_t & U_t^\top \\ U_t & Y_t \end{bmatrix} \succeq 0.$$

Problem (C.7) is still infinite dimensional since the decision variables are functions of time  $t \in [0, 1]$ ; however, it can be discretized, approximately using a first-order approximation of the derivatives in (C.7c), (C.7d) (Chen et al., 2015b) or exactly using a zero-order hold (Liu et al., 2025; Rapakoulas & Tsiotras, 2023), and solved to global optimality using a semidefinite programming solver such as MOSEK (Mosek, 2020).

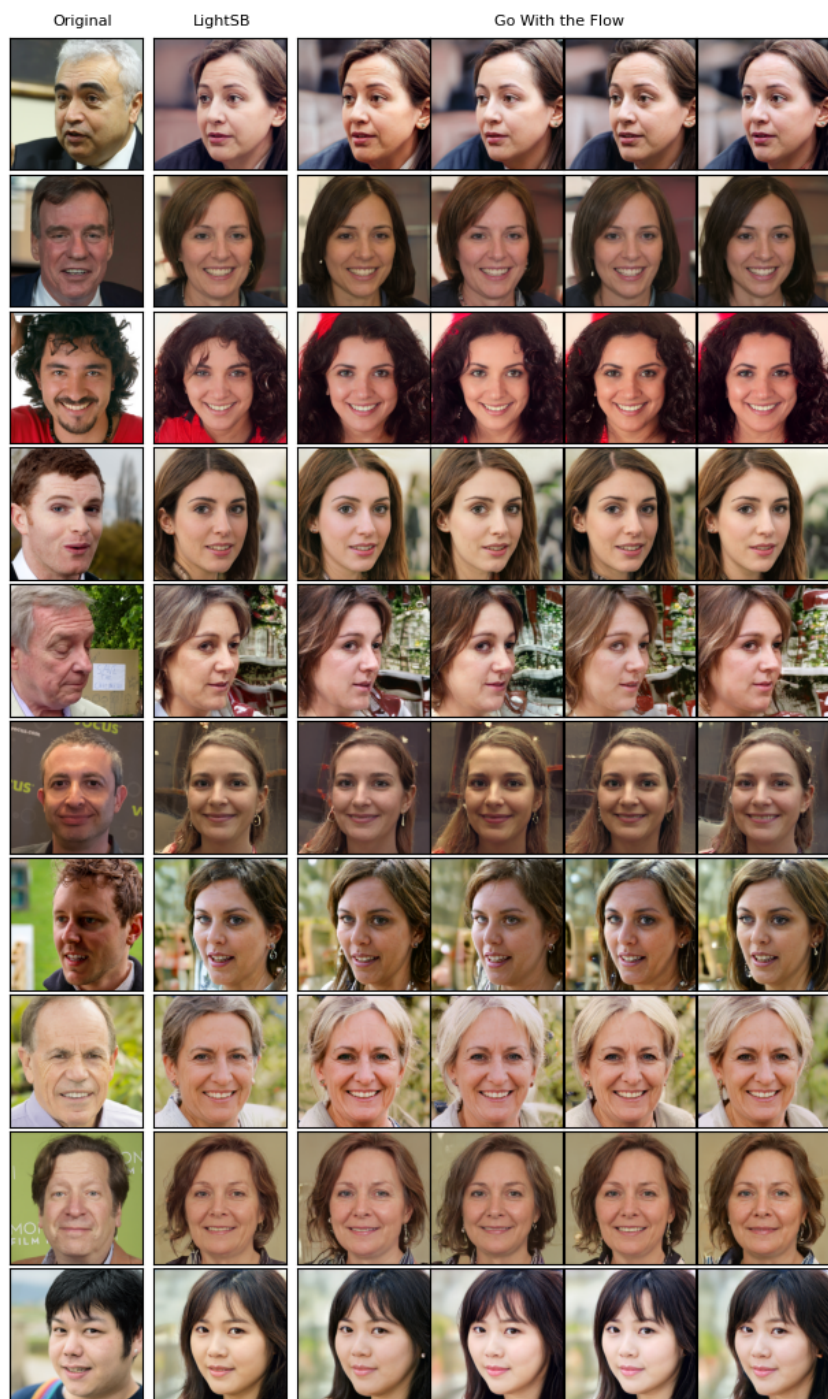

Figure 9: Further examples for the man-to-woman Image-to-Image translation task.



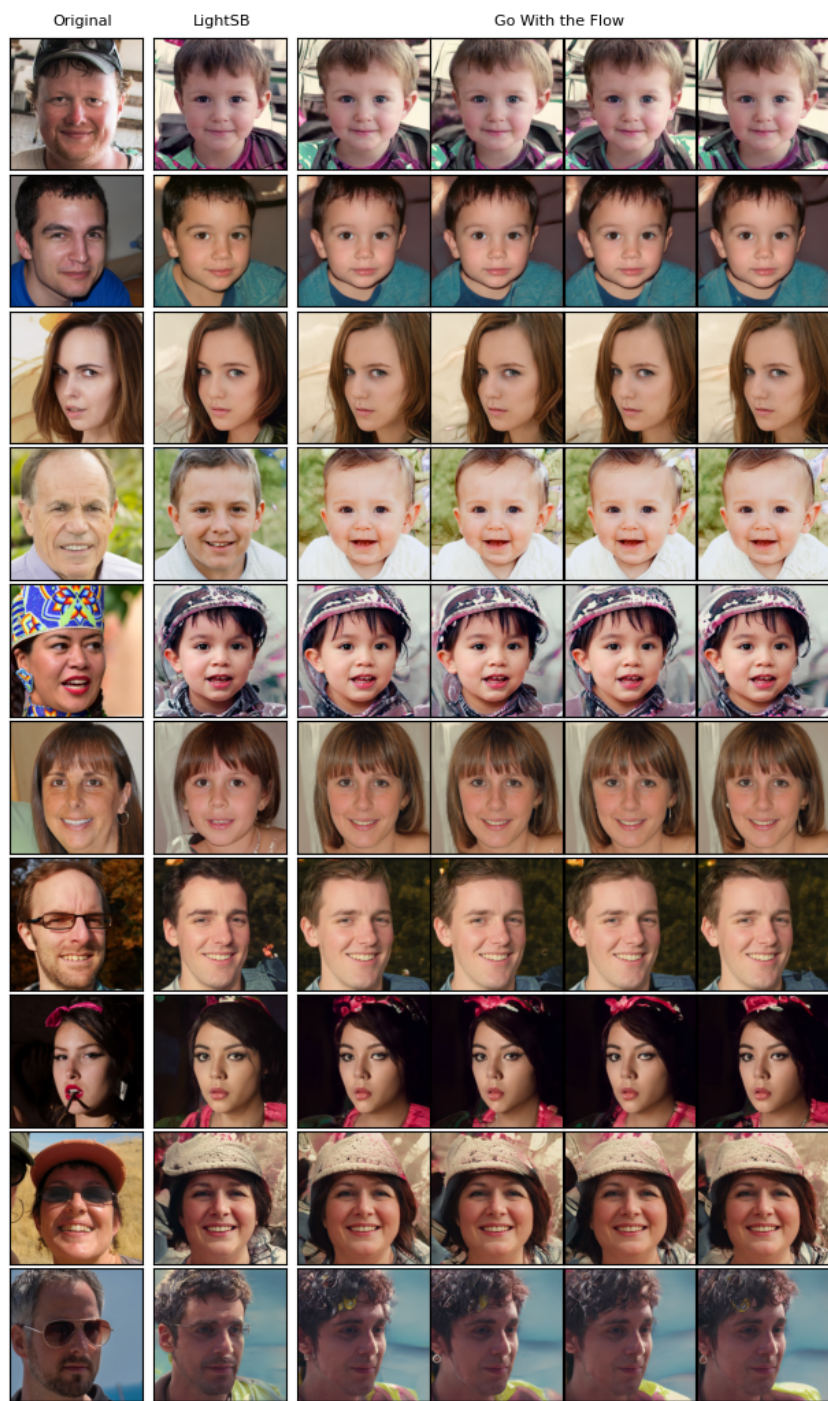

Figure 10: Further examples for the adult-to-child Image-to-Image translation task.

## References

- Michael Albergo and Eric Vanden-Eijnden. Building normalizing flows with stochastic interpolants. In *International Conference on Learning Representations*, Kigali Rwanda, May 2023.
- David F. Andrews and Colin L. Mallows. Scale mixtures of normal distributions. *Journal of the Royal Statistical Society. Series B (Methodological)*, 36(1):99–102, 1974.
- Martin Arjovsky, Soumith Chintala, and Léon Bottou. Wasserstein generative adversarial networks. In *International Conference on Machine Learning*, volume 70, pp. 214–223, Sydney, Australia, 2017. PMLR.
- Efstathios Bakolas. Finite-horizon covariance control for discrete-time stochastic linear systems subject to input constraints. *Automatica*, 91:61–68, 2018.
- Jean-David Benamou and Yann Brenier. A computational fluid mechanics solution to the Monge-Kantorovich mass transfer problem. *Numerische Mathematik*, 84(3):375–393, 2000.
- Alain Bensoussan, KCJ Sung, Sheung Chi Phillip Yam, and Siu-Pang Yung. Linear-quadratic mean field games. *Journal of Optimization Theory and Applications*, 169:496–529, 2016.
- Rajendra Bhatia, Tanvi Jain, and Yongdo Lim. On the Bures–Wasserstein distance between positive definite matrices. *Expositiones Mathematicae*, 37(2):165–191, 2019.
- Christopher M Bishop and Nasser M Nasrabadi. *Pattern Recognition and Machine Learning*, volume 4. Springer, 2006.
- Stephen Boyd and Lieven Vandenbergh. *Convex Optimization*. Cambridge University Press, Cambridge, UK, 1st edition, 2004.
- Damiano Brigo. The general mixture diffusion SDE and its relationship with an uncertain-volatility option model with volatility-asset decorrelation. *Available at SSRN 455060*, 2002.
- Damiano Brigo, Fabio Mercurio, and Giulio Sartorelli. Lognormal-mixture dynamics under different means, 2002.
- Charlotte Bunne and Gunnar Rätsch. Neural optimal transport predicts perturbation responses at the single-cell level. *Nature Methods*, 20:1639–1640, 2023.
- Charlotte Bunne, Laetitia Papaxanthos, Andreas Krause, and Marco Cuturi. Proximal optimal transport modeling of population dynamics. In *Proceedings of The 25th International Conference on Artificial Intelligence and Statistics*, volume 151 of *Proceedings of Machine Learning Research*, pp. 6511–6528. PMLR, 28–30 Mar 2022.
- Charlotte Bunne, Ya-Ping Hsieh, Marco Cuturi, and Andreas Krause. The Schrödinger bridge between Gaussian measures has a closed form. In *International Conference on Artificial Intelligence and Statistics*, volume 206, pp. 5802–5833. PMLR, 2023a.
- Charlotte Bunne, Stefan G Stark, Gabriele Gut, Jacobo Sarabia Del Castillo, Mitch Levesque, Kjong-Van Lehmann, Lucas Pelkmans, Andreas Krause, and Gunnar Rätsch. Learning single-cell perturbation responses using neural optimal transport. *Nature Methods*, 20(11):1759–1768, 2023b.
- Tianrong Chen, Guan-hong Liu, Molei Tao, and Evangelos A Theodorou. Deep multi-marginal momentum Schrödinger bridge. In *Proceedings of the 37th International Conference on Neural Information Processing Systems*, volume 36, pp. 57058–57086. Curran Associates, Inc., December 2023.
- Yongxin Chen. Density control of interacting agent systems. *Transactions on Automatic Control*, 69(1):246–260, 2024.
- Yongxin Chen, Tryphon T Georgiou, and Michele Pavon. Optimal steering of a linear stochastic system to a final probability distribution, part I. *Transactions on Automatic Control*, 61(5):1158–1169, 2015a.

- Yongxin Chen, Tryphon T Georgiou, and Michele Pavon. Optimal steering of a linear stochastic system to a final probability distribution, part II. *Transactions on Automatic Control*, 61(5):1170–1180, 2015b.
- Yongxin Chen, Tryphon T Georgiou, and Michele Pavon. Optimal transport over a linear dynamical system. *Transactions on Automatic Control*, 62(5):2137–2152, 2016.
- Yongxin Chen, Giovanni Conforti, and Tryphon T. Georgiou. Measure-valued spline curves: An optimal transport viewpoint. *SIAM Journal on Mathematical Analysis*, 50(6):5947–5968, January 2018.
- Yongxin Chen, Giovanni Conforti, Tryphon T Georgiou, and Luigia Ripani. Multi-marginal Schrödinger bridges. In *International Conference on Geometric Science of Information*, pp. 725–732, Toulouse, France, August 2019. Springer.
- Yongxin Chen, Tryphon T Georgiou, and Michele Pavon. Stochastic control liaisons: Richard Sinkhorn meets Gaspard Monge on a Schrödinger bridge. *SIAM Review*, 63(2):249–313, 2021.
- Paula Cordero-Encinar, O. Deniz Akyildiz, and Andrew B. Duncan. Non-asymptotic analysis of diffusion annealed Langevin Monte Carlo for generative modelling. *arXiv preprint arXiv:2502.09306*, 2025.
- Paolo Dai Pra. A stochastic control approach to reciprocal diffusion processes. *Applied Mathematics and Optimization*, 23(1):313–329, 1991.
- Valentin De Bortoli, James Thornton, Jeremy Heng, and Arnaud Doucet. Diffusion Schrödinger bridge with applications to score-based generative modeling. In *Advances in Neural Information Processing Systems*, volume 34, pp. 17695–17709, held virtually, 2021. Curran Associates, Inc.
- Rémi Flamary, Nicolas Courty, Alexandre Gramfort, Mokhtar Z Alaya, Aurélie Boisbunon, Stanislas Chambon, Laetitia Chapel, Adrien Corenflos, Kilian Fatras, Nemo Fournier, Léo Gautheron, Nathalie T.H. Gayraud, Hicham Janati, Alain Rakotomamonjy, Ievgen Redko, Antoine Rolet, Antony Schutz, Vivien Seguy, Danica J. Sutherland, Romain Tavenard, Alexander Tong, and Titouan Vayer. POT: Python optimal transport. *Journal of Machine Learning Research*, 22(78): 1–8, 2021.
- Hans Föllmer. Random fields and diffusion processes. *Lect. Notes Math*, 1362:101–204, 1988.
- Nikita Gushchin, Alexander Kolesov, Petr Mokrov, Polina Karpikova, Andrei Spiridonov, Evgeny Burnaev, and Alexander Korotin. Building the bridge of Schrödinger: A continuous entropic optimal transport benchmark. In *Advances in Neural Information Processing Systems*, volume 36, pp. 18932–18963, New Orleans, USA, 2023. Curran Associates, Inc.
- Nikita Gushchin, Sergei Kholkin, Evgeny Burnaev, and Alexander Korotin. Light and optimal Schrödinger bridge matching. In Ruslan Salakhutdinov, Zico Kolter, Katherine Heller, Adrian Weller, Nuria Oliver, Jonathan Scarlett, and Felix Berkenkamp (eds.), *Proceedings of the 41st International Conference on Machine Learning*, volume 235 of *Proceedings of Machine Learning Research*, pp. 17100–17122. PMLR, 21–27 Jul 2024.
- Dan Hendrycks and Kevin Gimpel. Gaussian error linear units (GELUs). *arXiv preprint arXiv:1606.08415*, 2016.
- Martin Heusel, Hubert Ramsauer, Thomas Unterthiner, Bernhard Nessler, and Sepp Hochreiter. GANs trained by a two time-scale update rule converge to a local Nash equilibrium. In *Advances in Neural Information Processing Systems*, volume 30. Curran Associates, Inc., 2017.
- Tero Karras, Samuli Laine, and Timo Aila. A style-based generator architecture for generative adversarial networks. *IEEE Transactions on Pattern Analysis and Machine Intelligence*, 43(12): 4217–4228, 2021.
- Juno Kim, Jaehyuk Kwon, Mincheol Cho, Hyunjong Lee, and Joong-Ho Won.  $t^3$ -variational autoencoder: Learning heavy-tailed data with student’s  $t$  and power divergence. In *International Conference on Learning Representations*, Vienna, Austria, May 2024.

- Alexander Korotin, Nikita Gushchin, and Evgeny Burnaev. Light Schrödinger bridge. In *The Twelfth International Conference on Learning Representations*, Vienna, Austria, May 2024.
- Takeshi Koshizuka and Issei Sato. Neural Lagrangian Schrödinger bridge: Diffusion modeling for population dynamics. In *The Eleventh International Conference on Learning Representations*, Kigali, Rwanda, May 2023.
- Christian Léonard. A survey of the Schrödinger problem and some of its connections with optimal transport. *Discrete & Continuous Dynamical Systems-A*, 34(4):1533–1574, 2014.
- Yaron Lipman, Ricky T. Q. Chen, Heli Ben-Hamu, Maximilian Nickel, and Matthew Le. Flow matching for generative modeling. In *International Conference on Learning Representations*, Kigali Rwanda, May 2023.
- Fengjiao Liu and Panagiotis Tsiotras. Reachability and controllability analysis of the state covariance for linear stochastic systems. *arXiv preprint arXiv:2406.14740*, 2024.
- Fengjiao Liu, George Rapakoulias, and Panagiotis Tsiotras. Optimal covariance steering for discrete-time linear stochastic systems. *Transactions on Automatic Control*, 70(4):2289–2304, 2025.
- Guan-Hong Liu, Tianrong Chen, Oswin So, and Evangelos Theodorou. Deep generalized Schrödinger bridge. In *Advances in Neural Information Processing Systems*, volume 35, pp. 9374–9388, Louisiana, LA, 2022. Curran Associates, Inc.
- Guan-Hong Liu, Yaron Lipman, Maximilian Nickel, Brian Karrer, Evangelos A Theodorou, and Ricky TQ Chen. Generalized Schrödinger bridge matching. In *International Conference on Learning Representations*, Vienna, Austria, 2024.
- Xingchao Liu, Chengyue Gong, and Qiang Liu. Flow straight and fast: Learning to generate and transfer data with rectified flow. In *International Conference on Learning Representations*, Kigali Rwanda, May 2023.
- Anton Mallasto, Augusto Gerolin, and Hà Quang Minh. Entropy-regularized 2-Wasserstein distance between Gaussian measures. *Information Geometry*, 5(1):289–323, 2022.
- Kevin R Moon, David Van Dijk, Zheng Wang, Scott Gigante, Daniel B Burkhardt, William S Chen, Kristina Yim, Antonia van den Elzen, Matthew J Hirn, Ronald R Coifman, Natalia B. Ivanova, Guy Wolf, and Smita Krishnaswamy. Visualizing structure and transitions in high-dimensional biological data. *Nature Biotechnology*, 37(12):1482–1492, 2019.
- ApS Mosek. Mosek modeling cookbook, 2020.
- Kushagra Pandey, Jaideep Pathak, Yilun Xu, Stephan Mandt, Michael Pritchard, Arash Vahdat, and Morteza Mardani. Heavy-tailed diffusion models. In *International Conference on Learning Representations*, Singapore, 2025.
- Fabian Pedregosa, Gaël Varoquaux, Alexandre Gramfort, Vincent Michel, Bertrand Thirion, Olivier Grisel, Mathieu Blondel, Peter Prettenhofer, Ron Weiss, Vincent Dubourg, Jake Vanderplas, Alexandre Passos, David Cournapeau, Matthieu Brucher, Matthieu Perrot, and Édouard Duchesnay. Scikit-learn: Machine learning in Python. *Journal of Machine Learning Research*, 12(85): 2825–2830, 2011.
- Stefano Peluchetti. Non-denoising forward-time diffusions. *arXiv preprint arXiv:2312.14589*, 2021.
- Stefano Peluchetti. Diffusion bridge mixture transports, Schrödinger bridge problems and generative modeling. *Journal of Machine Learning Research*, 24(374):1–51, 2023.
- Gabriel Peyré and Marco Cuturi. *Computational Optimal Transport: With Applications to Data Science*. Foundations and Trends in Machine Learning, 2019.
- Stanislav Pidhorskyi, Donald A Adjeroh, and Gianfranco Doretto. Adversarial latent autoencoders. In *Proceedings of the IEEE/CVF Conference on Computer Vision and Pattern Recognition*, pp. 14104–14113, Seattle, Washington, June 2020.

- George Rapakoulias and Panagiotis Tsiotras. Discrete-time optimal covariance steering via semidefinite programming. In *62nd Conference on Decision and Control*, pp. 1802–1807, Singapore, 2023.
- George Rapakoulias and Panagiotis Tsiotras. Discrete-time maximum likelihood neural distribution steering. In *IEEE 63rd Conference on Decision and Control (CDC)*, pp. 2195–2200, MiCo, Milan, Italy, 2024.
- Lars Ruthotto and Eldad Haber. An introduction to deep generative modeling. *GAMM-Mitteilungen*, 44(2):e202100008, 2021.
- Lars Ruthotto, Stanley J Osher, Wuchen Li, Levon Nurbekyan, and Samy Wu Fung. A machine learning framework for solving high-dimensional mean field game and mean field control problems. *Proceedings of the National Academy of Sciences*, 117(17):9183–9193, 2020.
- Filippo Santambrogio. *Optimal Transport for Applied Mathematicians*, volume 87. Springer, 2015.
- Augustinos D Saravanos, Yihui Li, and Evangelos A Theodorou. Distributed hierarchical distribution control for very-large-scale clustered multi-agent systems. In *Robotics: Science and Systems XIX*, Daegu, Republic of Korea, July 2023.
- Simo Särkkä and Arno Solin. *Applied Stochastic Differential Equations*, volume 10. Cambridge University Press, 2019.
- Yuyang Shi, Valentin De Bortoli, Andrew Campbell, and Arnaud Doucet. Diffusion Schrödinger bridge matching. In *Advances in Neural Information Processing Systems*, volume 36, pp. 62183–62223. Curran Associates, Inc., 2023.
- Antonio Terpin, Nicolas Lanzetti, and Florian Dörfler. Dynamic programming in probability spaces via optimal transport. *SIAM Journal on Control and Optimization*, 62(2):1183–1206, 2024a.
- Antonio Terpin, Nicolas Lanzetti, Martín Gadea, and Florian Dorfler. Learning diffusion at light-speed. In *Advances in Neural Information Processing Systems*, volume 37, pp. 6797–6832. Curran Associates, Inc., 2024b.
- Panagiotis Theodoropoulos, Nikolaos Komianos, Vincent Pacelli, Guan-Hong Liu, and Evangelos Theodorou. Feedback Schrödinger bridge matching. In *The Thirteenth International Conference on Learning Representations*, Singapore, 2025.
- Alexander Tong, Jessie Huang, Guy Wolf, David Van Dijk, and Smita Krishnaswamy. TrajectoryNet: A dynamic optimal transport network for modeling cellular dynamics. In *Proceedings of the 37th International Conference on Machine Learning*, volume 119 of *Proceedings of Machine Learning Research*, pp. 9526–9536. PMLR, 13–18 Jul 2020.
- Pauli Virtanen, Ralf Gommers, Travis E Oliphant, Matt Haberland, Tyler Reddy, David Cournapeau, Evgeni Burovski, Pearu Peterson, Warren Weckesser, Jonathan Bright, Stéfan J. van der Walt, Matthew Brett, Joshua Wilson, K. Jarrod Millman, Nikolay Mayorov, Andrew R.J. Nelson, Eric Jones, Robert Kern, Eric Larson, CJ Carey, Ilhan Polat, Yu Feng, Eric W. Moore, Jake VanderPlas, Denis Laxalde, Josef Perktold, Robert Cimrman, Ian Henriksen, E.A. Quintero, Charles R Harris, Anne M. Archibald, Antônio H. Ribeiro, Fabian Pedregosa, Paul van Mulbregt, and SciPy 1.0 Contributors. SciPy 1.0: fundamental algorithms for scientific computing in Python. *Nature Methods*, 17(3):261–272, 2020.
- Richard Lee Wheeden and Antoni Zygmund. *Measure and Integral*, volume 26. Dekker New York, 1977.

## NeurIPS Paper Checklist

### 1. Claims

Question: Do the main claims made in the abstract and introduction accurately reflect the paper's contributions and scope?

Answer: [\[Yes\]](#)

Justification: An accurate overview of the method, along with all the main claims about of the proposed approach are clearly stated in the abstract.

Guidelines:

- The answer NA means that the abstract and introduction do not include the claims made in the paper.
- The abstract and/or introduction should clearly state the claims made, including the contributions made in the paper and important assumptions and limitations. A No or NA answer to this question will not be perceived well by the reviewers.
- The claims made should match theoretical and experimental results, and reflect how much the results can be expected to generalize to other settings.
- It is fine to include aspirational goals as motivation as long as it is clear that these goals are not attained by the paper.

### 2. Limitations

Question: Does the paper discuss the limitations of the work performed by the authors?

Answer: [\[Yes\]](#)

Justification: The main limitations of the paper stemming from the applicability of Gaussian mixtures to high-dimensional problems have been well discussed.

Guidelines:

- The answer NA means that the paper has no limitation while the answer No means that the paper has limitations, but those are not discussed in the paper.
- The authors are encouraged to create a separate "Limitations" section in their paper.
- The paper should point out any strong assumptions and how robust the results are to violations of these assumptions (e.g., independence assumptions, noiseless settings, model well-specification, asymptotic approximations only holding locally). The authors should reflect on how these assumptions might be violated in practice and what the implications would be.
- The authors should reflect on the scope of the claims made, e.g., if the approach was only tested on a few datasets or with a few runs. In general, empirical results often depend on implicit assumptions, which should be articulated.
- The authors should reflect on the factors that influence the performance of the approach. For example, a facial recognition algorithm may perform poorly when image resolution is low or images are taken in low lighting. Or a speech-to-text system might not be used reliably to provide closed captions for online lectures because it fails to handle technical jargon.
- The authors should discuss the computational efficiency of the proposed algorithms and how they scale with dataset size.
- If applicable, the authors should discuss possible limitations of their approach to address problems of privacy and fairness.
- While the authors might fear that complete honesty about limitations might be used by reviewers as grounds for rejection, a worse outcome might be that reviewers discover limitations that aren't acknowledged in the paper. The authors should use their best

judgment and recognize that individual actions in favor of transparency play an important role in developing norms that preserve the integrity of the community. Reviewers will be specifically instructed to not penalize honesty concerning limitations.

### 3. Theory assumptions and proofs

Question: For each theoretical result, does the paper provide the full set of assumptions and a complete (and correct) proof?

Answer: [Yes]

Justification: All proofs are provided in the Appendices.

Guidelines:

- The answer NA means that the paper does not include theoretical results.
- All the theorems, formulas, and proofs in the paper should be numbered and cross-referenced.
- All assumptions should be clearly stated or referenced in the statement of any theorems.
- The proofs can either appear in the main paper or the supplemental material, but if they appear in the supplemental material, the authors are encouraged to provide a short proof sketch to provide intuition.
- Inversely, any informal proof provided in the core of the paper should be complemented by formal proofs provided in appendix or supplemental material.
- Theorems and Lemmas that the proof relies upon should be properly referenced.

### 4. Experimental result reproducibility

Question: Does the paper fully disclose all the information needed to reproduce the main experimental results of the paper to the extent that it affects the main claims and/or conclusions of the paper (regardless of whether the code and data are provided or not)?

Answer: [Yes]

Justification: We provide extensive details about all the experiments we conducted in the Appendices.

Guidelines:

- The answer NA means that the paper does not include experiments.
- If the paper includes experiments, a No answer to this question will not be perceived well by the reviewers: Making the paper reproducible is important, regardless of whether the code and data are provided or not.
- If the contribution is a dataset and/or model, the authors should describe the steps taken to make their results reproducible or verifiable.
- Depending on the contribution, reproducibility can be accomplished in various ways. For example, if the contribution is a novel architecture, describing the architecture fully might suffice, or if the contribution is a specific model and empirical evaluation, it may be necessary to either make it possible for others to replicate the model with the same dataset, or provide access to the model. In general, releasing code and data is often one good way to accomplish this, but reproducibility can also be provided via detailed instructions for how to replicate the results, access to a hosted model (e.g., in the case of a large language model), releasing of a model checkpoint, or other means that are appropriate to the research performed.
- While NeurIPS does not require releasing code, the conference does require all submissions to provide some reasonable avenue for reproducibility, which may depend on the nature of the contribution. For example
  - (a) If the contribution is primarily a new algorithm, the paper should make it clear how to reproduce that algorithm.



- (b) If the contribution is primarily a new model architecture, the paper should describe the architecture clearly and fully.
- (c) If the contribution is a new model (e.g., a large language model), then there should either be a way to access this model for reproducing the results or a way to reproduce the model (e.g., with an open-source dataset or instructions for how to construct the dataset).
- (d) We recognize that reproducibility may be tricky in some cases, in which case authors are welcome to describe the particular way they provide for reproducibility. In the case of closed-source models, it may be that access to the model is limited in some way (e.g., to registered users), but it should be possible for other researchers to have some path to reproducing or verifying the results.

## 5. Open access to data and code

Question: Does the paper provide open access to the data and code, with sufficient instructions to faithfully reproduce the main experimental results, as described in supplemental material?

Answer: [Yes]

Justification: We provide a link to a public implementation of our method in the abstract.

Guidelines:

- The answer NA means that paper does not include experiments requiring code.
- Please see the NeurIPS code and data submission guidelines (<https://nips.cc/public/guides/CodeSubmissionPolicy>) for more details.
- While we encourage the release of code and data, we understand that this might not be possible, so “No” is an acceptable answer. Papers cannot be rejected simply for not including code, unless this is central to the contribution (e.g., for a new open-source benchmark).
- The instructions should contain the exact command and environment needed to run to reproduce the results. See the NeurIPS code and data submission guidelines (<https://nips.cc/public/guides/CodeSubmissionPolicy>) for more details.
- The authors should provide instructions on data access and preparation, including how to access the raw data, preprocessed data, intermediate data, and generated data, etc.
- The authors should provide scripts to reproduce all experimental results for the new proposed method and baselines. If only a subset of experiments are reproducible, they should state which ones are omitted from the script and why.
- At submission time, to preserve anonymity, the authors should release anonymized versions (if applicable).
- Providing as much information as possible in supplemental material (appended to the paper) is recommended, but including URLs to data and code is permitted.

## 6. Experimental setting/details

Question: Does the paper specify all the training and test details (e.g., data splits, hyperparameters, how they were chosen, type of optimizer, etc.) necessary to understand the results?

Answer: [Yes]

Justification: We provide enough details in the experiments section of our paper, as well as in the Appendices.

Guidelines:

- The answer NA means that the paper does not include experiments.
- The experimental setting should be presented in the core of the paper to a level of detail that is necessary to appreciate the results and make sense of them.



- The full details can be provided either with the code, in the appendix, or as supplemental material.

## 7. Experiment statistical significance

Question: Does the paper report error bars suitably and correctly defined or other appropriate information about the statistical significance of the experiments?

Answer: [\[Yes\]](#)

Justification: We provide confidence intervals for the SWD and MMD indices in Table 3. We argue that the FID scores in Tables 1 and 2 do not need a confidence interval because they are computed with a very large number of samples (10,000).

Guidelines:

- The answer NA means that the paper does not include experiments.
- The authors should answer "Yes" if the results are accompanied by error bars, confidence intervals, or statistical significance tests, at least for the experiments that support the main claims of the paper.
- The factors of variability that the error bars are capturing should be clearly stated (for example, train/test split, initialization, random drawing of some parameter, or overall run with given experimental conditions).
- The method for calculating the error bars should be explained (closed form formula, call to a library function, bootstrap, etc.)
- The assumptions made should be given (e.g., Normally distributed errors).
- It should be clear whether the error bar is the standard deviation or the standard error of the mean.
- It is OK to report 1-sigma error bars, but one should state it. The authors should preferably report a 2-sigma error bar than state that they have a 96% CI, if the hypothesis of Normality of errors is not verified.
- For asymmetric distributions, the authors should be careful not to show in tables or figures symmetric error bars that would yield results that are out of range (e.g. negative error rates).
- If error bars are reported in tables or plots, The authors should explain in the text how they were calculated and reference the corresponding figures or tables in the text.

## 8. Experiments compute resources

Question: For each experiment, does the paper provide sufficient information on the computer resources (type of compute workers, memory, time of execution) needed to reproduce the experiments?

Answer: [\[Yes\]](#)

Justification: We provide details about the computational resources used to conduct the experiments.

Guidelines:

- The answer NA means that the paper does not include experiments.
- The paper should indicate the type of compute workers CPU or GPU, internal cluster, or cloud provider, including relevant memory and storage.
- The paper should provide the amount of compute required for each of the individual experimental runs as well as estimate the total compute.
- The paper should disclose whether the full research project required more compute than the experiments reported in the paper (e.g., preliminary or failed experiments that didn't make it into the paper).

## 9. Code of ethics

Question: Does the research conducted in the paper conform, in every respect, with the NeurIPS Code of Ethics <https://neurips.cc/public/EthicsGuidelines>?

Answer: [Yes]

Justification: We have read and comply with the NeurIPS Code of Ethics.

Guidelines:

- The answer NA means that the authors have not reviewed the NeurIPS Code of Ethics.
- If the authors answer No, they should explain the special circumstances that require a deviation from the Code of Ethics.
- The authors should make sure to preserve anonymity (e.g., if there is a special consideration due to laws or regulations in their jurisdiction).

#### 10. **Broader impacts**

Question: Does the paper discuss both potential positive societal impacts and negative societal impacts of the work performed?

Answer: [Yes]

Justification: We discuss the broader impact of the method at the end of our paper.

Guidelines:

- The answer NA means that there is no societal impact of the work performed.
- If the authors answer NA or No, they should explain why their work has no societal impact or why the paper does not address societal impact.
- Examples of negative societal impacts include potential malicious or unintended uses (e.g., disinformation, generating fake profiles, surveillance), fairness considerations (e.g., deployment of technologies that could make decisions that unfairly impact specific groups), privacy considerations, and security considerations.
- The conference expects that many papers will be foundational research and not tied to particular applications, let alone deployments. However, if there is a direct path to any negative applications, the authors should point it out. For example, it is legitimate to point out that an improvement in the quality of generative models could be used to generate deepfakes for disinformation. On the other hand, it is not needed to point out that a generic algorithm for optimizing neural networks could enable people to train models that generate Deepfakes faster.
- The authors should consider possible harms that could arise when the technology is being used as intended and functioning correctly, harms that could arise when the technology is being used as intended but gives incorrect results, and harms following from (intentional or unintentional) misuse of the technology.
- If there are negative societal impacts, the authors could also discuss possible mitigation strategies (e.g., gated release of models, providing defenses in addition to attacks, mechanisms for monitoring misuse, mechanisms to monitor how a system learns from feedback over time, improving the efficiency and accessibility of ML).

#### 11. **Safeguards**

Question: Does the paper describe safeguards that have been put in place for responsible release of data or models that have a high risk for misuse (e.g., pretrained language models, image generators, or scraped datasets)?

Answer: [NA]

Justification: Our work does not include pretrained Large Language Models or large datasets.

Guidelines:

- The answer NA means that the paper poses no such risks.

- Released models that have a high risk for misuse or dual-use should be released with necessary safeguards to allow for controlled use of the model, for example by requiring that users adhere to usage guidelines or restrictions to access the model or implementing safety filters.
- Datasets that have been scraped from the Internet could pose safety risks. The authors should describe how they avoided releasing unsafe images.
- We recognize that providing effective safeguards is challenging, and many papers do not require this, but we encourage authors to take this into account and make a best faith effort.

## 12. Licenses for existing assets

Question: Are the creators or original owners of assets (e.g., code, data, models), used in the paper, properly credited and are the license and terms of use explicitly mentioned and properly respected?

Answer: [\[Yes\]](#)

Justification: We properly cite any third-party tool used in our paper.

Guidelines:

- The answer NA means that the paper does not use existing assets.
- The authors should cite the original paper that produced the code package or dataset.
- The authors should state which version of the asset is used and, if possible, include a URL.
- The name of the license (e.g., CC-BY 4.0) should be included for each asset.
- For scraped data from a particular source (e.g., website), the copyright and terms of service of that source should be provided.
- If assets are released, the license, copyright information, and terms of use in the package should be provided. For popular datasets, [paperswithcode.com/datasets](https://paperswithcode.com/datasets) has curated licenses for some datasets. Their licensing guide can help determine the license of a dataset.
- For existing datasets that are re-packaged, both the original license and the license of the derived asset (if it has changed) should be provided.
- If this information is not available online, the authors are encouraged to reach out to the asset's creators.

## 13. New assets

Question: Are new assets introduced in the paper well documented and is the documentation provided alongside the assets?

Answer: [\[Yes\]](#)

Justification: We provide a public implementation of our algorithm in the abstract.

Guidelines:

- The answer NA means that the paper does not release new assets.
- Researchers should communicate the details of the dataset/code/model as part of their submissions via structured templates. This includes details about training, license, limitations, etc.
- The paper should discuss whether and how consent was obtained from people whose asset is used.
- At submission time, remember to anonymize your assets (if applicable). You can either create an anonymized URL or include an anonymized zip file.

## 14. Crowdsourcing and research with human subjects

Question: For crowdsourcing experiments and research with human subjects, does the paper include the full text of instructions given to participants and screenshots, if applicable, as well as details about compensation (if any)?

Answer: [NA]

Justification: We do not have any crowdsourcing experiments or experiments including humans.

Guidelines:

- The answer NA means that the paper does not involve crowdsourcing nor research with human subjects.
- Including this information in the supplemental material is fine, but if the main contribution of the paper involves human subjects, then as much detail as possible should be included in the main paper.
- According to the NeurIPS Code of Ethics, workers involved in data collection, curation, or other labor should be paid at least the minimum wage in the country of the data collector.

#### 15. **Institutional review board (IRB) approvals or equivalent for research with human subjects**

Question: Does the paper describe potential risks incurred by study participants, whether such risks were disclosed to the subjects, and whether Institutional Review Board (IRB) approvals (or an equivalent approval/review based on the requirements of your country or institution) were obtained?

Answer: [NA]

Justification: We do not have any experiments including humans.

Guidelines:

- The answer NA means that the paper does not involve crowdsourcing nor research with human subjects.
- Depending on the country in which research is conducted, IRB approval (or equivalent) may be required for any human subjects research. If you obtained IRB approval, you should clearly state this in the paper.
- We recognize that the procedures for this may vary significantly between institutions and locations, and we expect authors to adhere to the NeurIPS Code of Ethics and the guidelines for their institution.
- For initial submissions, do not include any information that would break anonymity (if applicable), such as the institution conducting the review.

#### 16. **Declaration of LLM usage**

Question: Does the paper describe the usage of LLMs if it is an important, original, or non-standard component of the core methods in this research? Note that if the LLM is used only for writing, editing, or formatting purposes and does not impact the core methodology, scientific rigor, or originality of the research, declaration is not required.

Answer: [NA]

Justification: We do not use LLMs in any part of our research.

Guidelines:

- The answer NA means that the core method development in this research does not involve LLMs as any important, original, or non-standard components.
- Please refer to our LLM policy (<https://neurips.cc/Conferences/2025/LLM>) for what should or should not be described.
